# Supplementary material for: Spatiotemporal biocontrol and rhizosphere microbiome analysis of Fusarium wilt of banana
Source: PubMed Central journal article supplement (PMC9834294; doi:10.1038/s42003-023-04417-w), 2023-01-11
Supplement: 42003_2023_4417_MOESM1_ESM.pdf [file 42003_2023_4417_MOESM1_ESM.pdf]

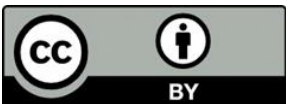

**Open Access** This file is licensed under a Creative Commons Attribution 4.0 International License, which permits use, sharing, adaptation, distribution and reproduction in any medium or format, as long as you give appropriate credit to the original author(s) and the source, provide a link to the Creative Commons license, and indicate if changes were made. In the cases where the authors are anonymous, such as is the case for the reports of anonymous peer reviewers, author attribution should be to 'Anonymous Referee' followed by a clear attribution to the source work. The images or other third party material in this file are included in the article's Creative Commons license, unless indicated otherwise in a credit line to the material. If material is not included in the article's Creative Commons license and your intended use is not permitted by statutory regulation or exceeds the permitted use, you will need to obtain permission directly from the copyright holder. To view a copy of this license, visit <http://creativecommons.org/licenses/by/4.0/>.

Reviewers' comments:

Reviewer #1 (Remarks to the Author):

GVNakato

1 **Spatiotemporal biocontrol and rhizosphere microbiome analysis of**  
2 **Fusarium wilt of banana**

3 Zhiyan Zhu<sup>1,2</sup>, Guiyun Wu<sup>3,4</sup>, Rufang Deng<sup>5</sup>, Xiaoying Hu<sup>5</sup>, Haibo Tan<sup>4</sup>, Yaping  
4 Chen<sup>2</sup>, Zhihong Tian<sup>1,\*</sup>, Jianxiong Li<sup>6,\*</sup>

5

6 <sup>1</sup>College of Life Sciences, Yangtze University, Jingzhou, China.

7 <sup>2</sup>South China Botanical Garden, Chinese Academy of Sciences, Guangzhou, China

8 <sup>3</sup>Science and Technology Innovation Center, Guangzhou University of Chinese  
9 Medicine, Guangzhou, China;

10 <sup>4</sup>Key Laboratory of Plant Resources Conservation and Sustainable Utilization, South  
11 China Botanical Garden, Chinese Academy of Sciences, Guangzhou China;

12 <sup>5</sup>Public Laboratory of Sciences, South China Botanical Garden, Chinese Academy of  
13 Sciences, Guangzhou, China

14 <sup>6</sup>Guangxi Key Laboratory of Agro-environment and Agric-products safety, College of  
15 Agriculture, Guangxi University, Nanning, China

16 \*Corresponding author: email: jxli920@gxu.edu.cn (J.X.L); zhtian@yangtzeu.edu.cn  
17 (Z.H.T)

18

19

20

21

22

23

24

25

26

27

28

29

30 **Abstract**

31 The soil-borne fungus *Fusarium oxysporum* f. sp. *cubense* tropical race 4 (*Foc* TR4)  
32 causes Fusarium wilt of banana (FWB), which devastates banana production  
33 worldwide. Biocontrol is considered to be the most efficient approach to reducing  
34 FWB. Here we introduce an approach that spatiotemporally apply *Piriformospora*  
35 *indica* and *Streptomyces morookaensis* strain Sm4-1986 according to their respective  
36 strength to increase biocontrol efficacy of FWB. *P. indica* successfully colonizes  
37 banana roots and promotes lateral root formation, and it also inhibits *Foc* TR4 growth  
38 inside the banana plants and reduces FWB. *S. morookaensis* strain Sm4-1986 secretes  
39 different secondary compounds, of which xerucitrinin A (XcA) and 6-pentyl- $\alpha$ -pyrone  
40 (6-PP) show the strongest anti-*Foc* TR4 activity. XcA is able to chelate iron, an  
41 essential nutrient in pathogen-plant interaction that determines the output of FWB. 6-  
42 PP, a volatile organic compound, inhibits *Foc* TR4 germination and promotes banana  
43 growth. Biocontrol trials in the field demonstrated that application of *S. morookaensis*  
44 improves soil properties and increases soil rhizosphere-associated microbes that are  
45 beneficial to banana growth, and thus significantly reduces disease incidence of FWB.  
46 Our study suggests that optimal utilization of the different biocontrol strains increases  
47 efficacy of biocontrol and that operating the iron accessibility in the rhizosphere is a  
48 promising strategy to control FWB.

49

50

51

52

53

54

55

56

57

58

59 **Introduction**

60 Bananas (*Musa* ssp.), originated in Southeast Asia and the Western Pacific<sup>1,2</sup>, are  
61 now widely distributed throughout the humid tropics and sub-tropics where they  
62 provide a staple food for about 400 million people in the developing countries in Africa,  
63 Asia, and Latin America<sup>3</sup>. Bananas are the most exported fruit in the world, having  
64 production of 129 million tons and export trade value of 13.6 billion dollars in 2019<sup>4</sup>.

65 Fusarium wilt of banana (FWB) caused by the soil-borne fungus *Fusarium*  
66 *oxysporum* f. sp. *cubense* (*Foc*) is one of the most destructive disease in banana  
67 production worldwide, which has restricted banana production for more than a century<sup>5</sup>.  
68 The epidemic of FWB leads to the almost complete replacement of the *Foc* race 1  
69 susceptible Gros Michel with the resistant Cavendish, which currently covers ca. 40%  
70 of the global production and may be well the only banana present on supermarket  
71 shelves of non-producer countries<sup>3,6</sup>. However, a newly emerged race of *Foc*, tropical  
72 race 4 (TR4), is virulent not only on Cavendish but also on all other banana cultivars.  
73 *Foc* TR4 caused serious losses in banana plantation worldwide, which resulted in  
74 abandonment of thousands of hectares of banana orchards. Currently, there are no  
75 effective methods to control FWB caused by *Foc* TR4.

76 The *Foc* pathogen can linger in soil for up to 30 years even in the absence of plant  
77 hosts, which makes it particularly difficult to be eliminated from the infected soil<sup>7,8</sup>. As  
78 being a vascular pathogen, *Foc* colonizes banana roots and reaches the vascular  
79 bundles<sup>3</sup>, leading to the ineffectiveness of chemical control. Repeated use of chemical  
80 reagents has raised great concern for environmental pollution and human health.  
81 Breeding resistant cultivars is thought to be the most effective way to control FWB, but  
82 all commercial banana varieties tested are susceptible to *Foc* TR4, and they are  
83 propagated by cloning due to the nature of sterile triploid<sup>9</sup>. Thus, biological control of  
84 FWB has gained great interest<sup>10</sup>.

85 *Piriformospora indica* is a well-known endophytic fungus that colonizes roots of a  
86 broad spectrum of plant species and confers diverse beneficial effects on host plants by  
87 promoting growth or enhancing disease resistance<sup>11-13</sup>. Besides, it also acts as a

88 biocontrol agent against plant pathogens including *Fusarium culmorum* and  
89 *Verticillium dahliae*<sup>14,15</sup>. Streptomyces are naturally abundant in soils, and it is likely  
90 that they will cause less damage to the surrounding ecosystem when applied. Many  
91 *Streptomyces* species have been used as biocontrol agents to protect plants against  
92 various diseases due to their ability to produce a range of secondary metabolites that  
93 can either inhibit the growth of phytopathogens or promote plant growth<sup>16-18</sup>.  
94 Additionally, application of Streptomyces improved the soil microbial communities and  
95 enhanced plant resistance to pathogens<sup>19</sup>. Rhizosphere is an important interface  
96 involved in exchange of resources including nutrients, compounds, etc. between the  
97 plants, the soil environment, and the microbes. It has been known that competition for  
98 essential nutrients such as iron in the rhizosphere is a crucial factor that determines the  
99 survival of microbes<sup>20</sup>. Rhizosphere microbial organisms that produce growth-  
100 inhibitory siderophores could suppress the pathogen growth and thus protect plants  
101 against pathogen infection<sup>21</sup>. The approach that takes advantage of the ability of  
102 microbes in restricting pathogens access to the essential nutrients is an effective  
103 strategy for biocontrol. In addition, the procedure of how to use biocontrol agents  
104 affects biocontrol efficacy when different biocontrol agents are used together.

105 Here, we present a spatiotemporal approach using *Piriformospora indica* in the  
106 endophytic compartments and *Streptomyces morookaensis* in the rhizosphere to  
107 controlling FWB. *S. morookaensis* strain 4-1986 (Sm4-1986) improves soil properties,  
108 shifts rhizosphere microbial structures, and suppresses *Foc* TR4 growth by secreting  
109 active compounds when applied to the field. *P. indica* colonizes and proliferates in the  
110 intracellular spaces within the banana roots to promote lateral root formation and  
111 restrict the growth and extension of *Foc* TR4 inside the banana roots. In addition, soil  
112 properties such as pH and iron content are also important factors affecting the control  
113 of FWB.

## 114 **Results**

115 **Identification of metabolic compounds suppressing *Foc* TR4.** *S. morookaensis* Sm4-  
116 1986 displayed antifungal activity against *Foc* TR4<sup>22</sup>. We reasoned that the anti-*Foc*

117 TR4 activity of Sm4-1986 might be due to the secreted compounds. In PDB medium,  
118 GFP-labeled *Foc* TR4 grew well showing strong fluorescence (Fig. 1a), on the contrary,  
119 addition of the Sm4-1986 supernatant significantly suppressed the growth of *Foc* TR4  
120 as revealed by the great reduction of GFP intensity (Fig. 1b), suggesting the antifungal  
121 activity of Sm4-1986 supernatant against *Foc* TR4.

122 A set of metabolic compounds was isolated from Sm4-1986 supernatant and tested  
123 for the antifungal activity<sup>23</sup>. Xerucitrinin A (XcA) (Fig. 1c) and 6-pentyl- $\alpha$ -pyrone (6-  
124 PP) (Fig. 1d) are particularly interesting because they showed the strongest anti-*Foc*  
125 TR4 activity. Further analysis showed that 3 mM XcA completely suppressed the  
126 germination of GFP-labeled *Foc* TR4 spores and greatly reduced GFP fluorescence  
127 when compared with the untreated GFP-labeled *Foc* TR4 as examined by laser confocal  
128 microscopy (Extended Data Fig. 1a, b). Since Sm4-1986 was able to produce iron-  
129 chelating siderophores<sup>22</sup>, we then examined the iron-chelating activity of the isolated  
130 compounds. Chrome Azurol Sulphonate (CAS) agar assay showed that there was a clear  
131 yellow zone around the Oxford cup, indicating a strong iron-chelating ability of XcA  
132 (Fig. 1e).

133 6-PP is another important compound isolated from Sm4-1986. *Foc* TR4 grew well  
134 in PDB medium as indicated by the consistently increasing optical density, however,  
135 the optical density of *Foc* TR4 culture decreased when 6-PP (0.96 mM final  
136 concentration) were added (Fig. 1f), suggesting the inhibition of 6-PP on the growth of  
137 *Foc* TR4. To further investigate the effect of 6-PP on *Foc* TR4 growth, we counted the  
138 number of *Foc* TR4 spores under microscope. 6-PP treatment significantly reduced the  
139 number of *Foc* TR4 spores and completely inhibited spore germination (Fig. 1g).  
140 Consistent with this, confocal observation showed that GFP fluorescence was greatly  
141 diminished after 6-PP treatment (Extended Data Fig. 1c). *Foc* TR4 is able to produce  
142 fusaric acid that acts as a virulent factor to increase environmental acidity<sup>24</sup>. We  
143 observed the pH value of *Foc* TR4 solution under normal condition was greatly  
144 decreased after 72 h cultivation, however, the pH value of *Foc* TR4 solution treated by  
145 6-PP did not change even after cultivation for 96 h (Extended Data Fig. 1d).



146 To explore morphological and structural changes of *Foc* TR4 spores under the  
147 treatments of XcA and 6-PP, we used scanning electron microscope (SEM) and  
148 transmission electron microscope (TEM) to observe the shape of *Foc*TR4 spores. The  
149 surface of *Foc* TR4 spores became wrinkled when treated with XcA (Fig. 2a) and the  
150 spores were collapsed when treated by 6-PP treatment (Fig. 2b) when compared to the  
151 normal *Foc* TR4 spores (Fig. 2c). Furthermore, SEM observation showed that treatment  
152 with 6-PP for 24 h resulted in a thinner cell wall and a massive cytoplasm without  
153 integral organelles such as mitochondria (Fig. 2d, e) when compared with the normally  
154 grown *Foc* TR4 spores (Fig. 2f, g).

155 Since XcA and 6-PP were isolated from Sm4-1986 and each has antifungal activity  
156 against *Foc* TR4, we hypothesized that coexistence of these two compounds may have  
157 synergistic effect on suppressing *Foc* TR4. To test this hypothesis, we used response  
158 surface methodology (RSM) to analyze the interaction between XcA and 6-PP and to  
159 examine how these two compounds synergistically affect *Foc* TR4 germination at  
160 different concentrations. RSM analyses revealed that coexistence of XcA and 6-PP at  
161 lower concentrations was able to suppress *Foc* TR4 spore germination, indicating a  
162 synergistic effect of these two compounds (Fig. 2h and Extended Data Fig. 2). Given  
163 the inhibitory effect of XcA and 6-PP on *Foc* TR4, we therefore asked what are their  
164 effects on banana growth. Experiments with banana plantlets showed that lower  
165 concentrations of 6-PP (<150  $\mu$ M) promoted banana plantlet growth although higher  
166 concentrations (>200  $\mu$ M) showed side effects to banana plantlets (Extended Data Fig.  
167 3). Regarding to XcA, banana plantlets grew well when treated for 65 days by 3 mM  
168 XcA, the concentration to inhibit *Foc* TR4 germination, when compared with the  
169 control. This indicates that XcA may be non-toxic to banana plants (Extended Data Fig.  
170 4).

171 ***P. indica* induces lateral root formation and suppresses *Foc* TR4 growth.** *P. indica*  
172 is symbiotically associated with a variety of host plants<sup>25</sup>. To explore the colonization  
173 pattern of *P. indica* in banana, we observed the *P. indica*-treated banana roots under  
174 microscope. *P. indica* entered banana roots primarily through root hairs (Extended

175 Data Fig. 5a) and, later, crossed cortex and endodermis, and then moved to stele and  
176 aggregated at the lateral root primordium initiation sites (Fig. 3a and Extended Data  
177 Fig. 5b). In agreement with these phenomena, *P. indica*-treated banana plantlets  
178 showed more lateral roots than untreated ones (Fig. 3b, c).

179 *Foc* TR4 is able to penetrate cortical parenchyma cells and reach the vascular  
180 bundle tissues of roots<sup>26</sup>. Therefore, inhibiting *Foc* TR4 growth and extension in the  
181 endophytic compartments of banana roots is an important part of FWB control. To  
182 investigate the interaction between *Foc* TR4 and *P. indica*, we co-cultured these two  
183 strains and observed their overlaid hyphae. SEM images showed that *P. indica* tightly  
184 clasped *Foc* TR4 and resulted in the collapse of *Foc* TR4 hyphae, suggesting an  
185 inhibitory effect of *P. indica* on *Foc* TR4 (Fig. 3d-f).

186 We then examined the effects of *P. indica* on growth of banana and control of  
187 Fusarium wilt disease. Inoculation with *P. indica* ( $1 \times 10^6$  chlamydospores/ml)  
188 promoted the growth of banana plantlets (Extended Data Fig. 6a, b and Supplementary  
189 Table 1). On the contrary, infection with *Foc* TR4 led to the occurrence of typical  
190 Fusarium wilt disease symptoms on banana plantlets (Extended Data Fig. 6c). However,  
191 if the banana plantlets were first inoculated with *P. indica* and then infected by *Foc* TR4,  
192 they showed less disease symptoms and grew better than *Foc* TR4-treated plantlets  
193 (Extended Data Fig. 6c, d and Supplementary Table 1). In agreement with the external  
194 symptoms, investigation of the internal symptoms of banana rhizomes showed that *P.*  
195 *indica* treatment greatly reduced the discoloration caused by *Foc* TR4 infection  
196 (Extended Data Fig. e-h).

197 ***P. indica* and *S. morookaensis* synergistically control FWB in field.** Experiments in  
198 greenhouse demonstrated that both *P. indica* and *S. morookaensis* are able to promote  
199 banana growth and suppress *Foc* TR4<sup>22</sup>. We further investigated the biocontrol efficacy  
200 of these two strains in field.

201 The field trials were carried out in two consecutive years in a land that had been  
202 abandoned due to the severe infection of *Foc* TR4. The field and bananas plantlets were  
203 treated with Sm 4-1986 and *P. indica*, respectively, 7 days before transplantation. By

204 the end of the year, banana plants in the field were scored for Fusarium wilt disease  
205 incidence by investigating both the external and the internal disease symptoms, and the  
206 total Fusarium wilt disease incidence was reduced to 11.7% (164 of the 1,400 plants  
207 showed disease).

208 Banana plants with Fusarium wilt disease were cut down, and the sites were treated  
209 with *S. morookaensis* strain Sm4-1986 again in the next year. Banana plantlets were  
210 treated with *P. indica* 7 days before transplantation. By the end of the year, Fusarium  
211 wilt disease incidence of the treated banana plants was 9.1% (15 of the 164 diseased  
212 plants still remained disease), and most of the *P. indica*-treated banana plants grown in  
213 the Sm4-1986 treated sites did not show Fusarium wilt symptoms (Extended Data Fig.  
214 7a). In contrast, all the untreated banana plants grown in the hotspots showed severe  
215 Fusarium wilt symptoms (Extended Data Fig. 7b),

216 **Improved rhizosphere microbiome and soil property during the biocontrol of**  
217 **FWB.** We next asked how the application of biocontrol strains changes the richness and  
218 diversity of rhizosphere microbiome during the biocontrol of FWB. ACE, Chao1, and  
219 Shannon indexes revealed that the rhizosphere soil of healthy plants generally harbored  
220 richer and more diverse microbial communities than that of the diseased plants, and  
221 continuous biocontrol application further increased the microbial richness and diversity  
222 (Supplementary Table 2). To further compare the structure of microbiota in the  
223 rhizosphere between the healthy and diseased plants, we applied principal coordinate  
224 analysis (PCoA) with bray-curtis distances to analyze the microbial data. The results  
225 revealed the clusters of the microbial communities in the rhizosphere between the  
226 healthy and diseased plants were clearly separated from each other (Extended Data Fig.  
227 8a, b), and biocontrol of FWB further improved the separation of microbial  
228 communities (Fig. 4a, b).

229 The linear discriminant analysis effect size (LEfSe) method was used to identify  
230 differential biomarkers in the healthy and diseased rhizosphere soils. In bacterial  
231 community, the uncultured bacteria belonging to *Acidobacteriaceae*, *Acetobacteraceae*,  
232 and *Gammaproteobacteria* were biomarkers for diseased plants, whereas

233 *Sphingomonadaceae* and *Gemmatimonadeceae* could be used as biomarkers for healthy  
234 plants (Extended Data Fig. 9a). In fungal community, *Hydnodontaceae*, *Trechispora*,  
235 and *Morosphaeriaceae* were biomarkers for diseased plants, in contrast, *Leptodiscella*,  
236 *Acrospermales* and *Cladorrhinum* could be used as biomarkers for healthy plants  
237 (Extended Data Fig. 9b). To gain insight into the role of important microbial species  
238 behind pathogen suppression, we identified the potential driver taxa in the microbiome  
239 networks between the case (healthy) and control (diseased) based on the NetShift  
240 analysis. *Chthoniobacter*, *Mesorhizobium*, *Dyella*, *Streptomyces*, and some uncultured  
241 bacteria in bacterial community (Fig. 4c) together with *Enterocarpus*, *Leptobacillum*,  
242 *Musidium*, and *Humicola* in fungal community (Fig. 4d) were as the keystone taxa  
243 behind pathogen suppression in the initial microbiome of diseased plants.

244 To explore the relationship between soil properties and occurrence of FWB in  
245 banana plants, we measured total nitrogen (TN), total phosphorus (TP), total ferrum  
246 ( $\text{Fe}^{3+}$ , TF), and pH values of the soils from the healthy and diseased plants  
247 (Supplementary Table 3). Redundancy analysis (RDA) showed that higher TN, TP, and  
248 pH were positively correlated with the healthy plants, whereas higher TF was positively  
249 correlated with the diseased plants, and soil moisture had no effects on the disease (Fig.  
250 4e, f).

251 **Iron is a key factor in the control of FWB.** Since high TF is always positively  
252 associated with FWB, we, therefore, examined the role of iron in the control of FWB.  
253 We used ethylenediaminedi-*O*-hydroxyphenylacetic acid (EDDHA) compound, one of  
254 the most efficient iron-chelating agents, to reduce available iron in the medium<sup>27, 28</sup>.  
255 Addition of EDDHA (final concentration of 4 mM) completely suppressed the growth  
256 of *Foc* TR4 in comparison with the control on PDA (Fig. 5a, b). On the other hand,  
257 banana plantlets treated with the same concentration of EDDHA grew well and did not  
258 show much difference to the control (Fig. 5c, d). As expected, banana plantlets infected  
259 by *Foc* TR4 showed severe disease symptoms and died (Fig. 5e), and the presence of  
260 EDDHA protected banana plantlets from being infected by *Foc* TR4 (Fig. 5f). 8-  
261 Hydroxyquinoline (8HQ) is another well-known iron chelator, and 200  $\mu\text{M}$  8HQ

262 sufficiently suppressed *Foc* TR4 growth (Extended Data Fig. 10a, b). On the other hand,  
263 banana plantlets grown in the pots filled with *Foc* TR4-treated soil showed Fusarium  
264 disease symptoms (Extended Data Fig. 10c), but those plants in the pots that were  
265 treated with 200  $\mu$ M 8HQ grew well and did not show Fusarium disease symptoms,  
266 indicating that the Fusarium wilt disease was successfully controlled (Extended Data  
267 Fig. 10d).

## 268 Discussion

269 *P. indica*, a versatile root endophytic symbiont, grows intracellularly in the root  
270 cortex but not in the central part of the roots beyond endodermis when associated with  
271 barley<sup>11,29</sup>, however it is able to penetrate endodermis and reach the stele of banana  
272 roots. *Foc* TR4 penetrates the cortex parenchyma of the roots and enters the xylem  
273 catheters when it infects the banana plants<sup>26</sup>. If they encounter in banana roots, *P. indica*  
274 is able to restrict the growth of *Foc* TR4 and reduce the disease symptoms. This  
275 hypothesis was supported by the observations that *P. indica* is able to clasp *Foc* TR4  
276 and application of *P. indica* on banana plantlets leads to the reduced Fusarium wilt  
277 disease. Control of *Foc* TR4 growth and extension in the endophytic compartments of  
278 bananas is an important step of the procedure for controlling FWB, and *P. indica*  
279 functions in this step and plays important roles in the control of FWB. It was reported  
280 that *P. indica* promotes plant growth by producing auxin<sup>30,31</sup>. The auxin-induced  
281 changes of endodermis cells are required for the initiation of lateral root primordia in  
282 underlying pericycle cells, and later the hormone auxin triggers lateral root  
283 development<sup>32,33</sup>. When colonized in banana roots, *P. indica* preferred to aggregate at  
284 the lateral root primordia and promote more lateral roots than untreated ones. More  
285 lateral roots enable better growing of plants, which enhances disease resistance to  
286 pathogens.

287 *S. morookaensis* was used to control FWB in the field. Analysis of the soil  
288 properties showed that iron increase is associated with higher incidence of FWB  
289 whereas pH increase is associated with the lower incidence of FWB, indicating that iron  
290 and pH are two important factors in the control of FWB. Consistent with these results,

291 previous reports have showed that iron competition in fungus-plant interactions is the  
292 most important mechanism for biocontrol of plant diseases<sup>34,35</sup>. However, banana is  
293 cultivated in tropical and subtropical areas where the soils are acidified and enriched  
294 with iron, which makes it difficult to control FWB. In these respects, any strategy that  
295 increases soil pH and/or decreases iron content may help reduce the incidence of FWB.  
296 Experiments using EDDHA and 8HQ confirmed the importance of iron in the control  
297 of FWB, which establishes a causal mechanistic link between iron utilization and FWB  
298 control. Siderophores are small molecules that can easily bind to ferric iron, restricting  
299 the accessibility to other microbes, therefore, microbial strains that produce  
300 siderophores and suppress *Foc* TR4 growth are particular attractive in the control of  
301 FWB. *S. morookaensis* strain Sm4-1986 produces different compounds that not only  
302 chelate iron but also suppress *Foc* TR4 growth. Sm4-1986 produces various compounds,  
303 of which XcA and 6-PP play important roles in control of FWB; the former not only  
304 chelates iron but also deforms *Foc* TR4 spores, and the latter promotes plant growth  
305 and inhibits *Foc* TR4 germination. Additionally, combinatorial utilization of these two  
306 compounds synergistically increases inhibition effects on the growth of *Foc* TR4,  
307 implying the efficient inhibition of *Foc* TR4 and potential utilization of these two  
308 compounds in the control of FWB. In agreement with this, application of *S.*  
309 *morookaensis* strain Sm4-1986 in the field greatly reduced the incidence of FWB.

310 The rhizosphere microbiome greatly affects the outputs of the interaction between  
311 plants and microbes. Application of a biocontrol agent may have important impacts on  
312 the composition, structure, and functionality of the rhizosphere microbiome. The  
313 biomarker microbes were significantly different after the treatment of *S. morookaensis*  
314 strain Sm4-1986. *Acidobacteriaceae* is acidophilic and extremely abundant in acidic  
315 environments, and *Acetobacteraceae* can oxidize ethanol to acetic acid in neutral or  
316 acidic environments. They are two biomarkers for the diseased plants and correspond  
317 to the low pH. However, *Cladorrhinum foecundissimum* is a biomarker for the Sm4-  
318 1986-treated healthy plants, and this endophyte increases uptake of phosphorus by  
319 plants and promotes growth of the colonized plants<sup>36</sup>. This result indicated that *S.*

320 *morookaensis* increased rhizosphere microbiome that are beneficial to banana growth  
321 and it is an efficient biocontrol agent to FWB.

322 Biocontrol is a comprehensive strategy that consists of many complex and  
323 interconnected factors which can influence the efficacy of biocontrol in the field.  
324 Combinatorial application of different strains is a good strategy to increase the  
325 biocontrol efficacy, but much attention must be paid to the procedures of how to apply  
326 the different strains. Various methods that deliver biocontrol strains to plants and soils  
327 also influences the consistency of biocontrol. Thus, optimizing the mode of delivery  
328 of biocontrol strains determines the success of biocontrol. The first layer of biocontrol  
329 is to reduce the infection rate of pathogen in the soil. *S. morookaensis* produces a set  
330 of secondary compounds with different functions in suppressing *Foc* TR4 growth and  
331 reducing *Foc* TR4 spore number, which, consequently, reduces the infection chance of  
332 banana plants in the field. The secondary layer is to restrict pathogen growth and  
333 extension in the endophytic compartments of banana plants in case the pathogen  
334 escapes the first layer and colonizes the roots. *P. indica* functions in this front and  
335 inhibits *Foc* TR4 growth in banana plants. Spatiotemporal application of *P. indica* and  
336 *S. morookaensis* to banana plants and the field is to take advantages of the  
337 characteristics of these two strains to increase biocontrol efficacy of FWB.

### 338 **References**

- 339 1. Davey, M. W. et al. A draft *Musa balbisiana* genome sequence for molecular  
340 genetics in polyploid, inter-and intra-specific *Musa* hybrids. *BMC Genomics* **14**,  
341 683 (2013).
- 342 2. Wang, Z. et al. *Musa balbisiana* genome reveals subgenome evolution and  
343 functional divergence. *Nat. Plants* **5**, 810-821 (2019).
- 344 3. Bubici, G., Kaushal, M., Prigigallo, M. I., Gómez-Lama Cabanás, C. & Mercado-  
345 Blanco, J. Biological control agents against Fusarium wilt of banana. *Front.*  
346 *Microbiol.* **10**, 616 (2019).
- 347 4. FAOSTAT. <http://www.fao.org/faostat/en/#home> (2019).
- 348 5. Dusunceli, F. Global programme on banana Fusarium wilt disease: protecting

- 349 banana production from the disease with focus on tropical race 4 (TR4). Available  
350 online at <http://www.fao.org> (2017).
- 351 6. Dale, J. et al. Transgenic Cavendish bananas with resistance to *Fusarium* wilt  
352 tropical race 4. *Nat. Commun.* **8**, 1496-1504 (2017).
- 353 7. Buddenhagen, I. Understanding strain diversity in *Fusarium oxysporum* f. sp.  
354 *cubense* and history of introduction of ‘tropical race 4’ to better manage banana  
355 production. *Acta Hort.* **828**, 193-204 (2009).
- 356 8. Maxmen, A. CRISPR might be the banana’s only hope against a deadly fungus.  
357 *Nature* **574**, 15 (2019).
- 358 9. Hwang, S. C. & Ko, W. H. Cavendish banana cultivars resistant to *Fusarium* wilt  
359 acquired through somaclonal variation in Taiwan. *Plant Dis.* **88**, 580-588 (2004).
- 360 10. Spadaro, D. & Gullino, M. L. Improving the efficacy of biocontrol agents against  
361 soilborne pathogens. *Crop Prot.* **24**, 601-613 (2005).
- 362 11. Waller, F. et al. The endophytic fungus *Piriformospora indica* reprograms barley  
363 to salt-stress tolerance, disease resistance, and higher yield. *Proc. Natl Acad. Sci.*  
364 *USA* **102**, 13386-13391 (2005).
- 365 12. Lee, Y. C. et al. Growth promotion of Chinese cabbage and Arabidopsis by  
366 *Piriformospora indica* is not stimulated by mycelium-synthesized auxin. *Mol.*  
367 *Plant Microbe Interact.* **24**, 421-431 (2011).
- 368 13. Ye, W. et al. Colonisation of *Oncidium* orchid roots by the endophyte  
369 *Piriformospora indica* restricts *Erwinia chrysanthemi* infection, stimulates  
370 accumulation of NBS-LRR resistance gene transcripts and represses their targeting  
371 micro-RNAs in leaves. *BMC Plant Biol.* **19**, 601-617 (2019).
- 372 14. Harrach, B.D., Baltruschat, H., Barna, B., Fodor, J. & Kogel, K. H. The  
373 Mutualistic fungus *Piriformospora indica* protects barley roots from a loss of  
374 antioxidant capacity caused by the necrotrophic pathogen *Fusarium culmorum*.  
375 *Mol. Plant Microbe Interact.* **26**, 599-605 (2013).
- 376 15. Sun, C. et al. The beneficial fungus *Piriformospora indica* protects Arabidopsis  
377 from *Verticillium dahliae* infection by downregulation plant defense responses.



- 378 *BMC Plant Biol.* **14**, 268-282 (2014).
- 379 16. Rose, S., Parker, M. & Punja, Z. K. Efficacy of biological and chemical treatments  
380 for control of Fusarium root and stem rot on greenhouse cucumber. *Plant Dis.* **87**,  
381 1462-1470 (2003).
- 382 17. Olanrewaju, O. S. & Babalola, O. O. *Streptomyces*: implications and interactions  
383 in plant growth promotion. *Appl. Microbiol. Biotechnol.* **103**, 1179-1188 (2019).
- 384 18. Jing, T. et al. Newly isolated *Streptomyces* sp. JBS5-6 as a potential biocontrol  
385 agent to control banana Fusarium wilt: genome sequencing and secondary  
386 metabolite cluster profiles. *Front. Microbiol.* **11**, e602591 (2020).
- 387 19. Zhang, H. Y., Xue, Q. H., Shen, G. H. & Wang, D. S. Effects of actinomycetes  
388 agent on ginseng growth and rhizosphere soil microflora. *Chin. J. Appl. Ecol.* **8**,  
389 2287-2293 (2013).
- 390 20. Hyakumachi, M. Studies on biological control of soilborne plant pathogens. *J. Gen.*  
391 *Plant Pathol.* **66**, 272-274 (2000).
- 392 21. Gu, S. et al. Competition for iron drives phytopathogen control by natural  
393 rhizosphere microbiomes. *Nat. Microbiol.* **5**, 1002-1010 (2020).
- 394 22. Zhu, Z., Tian, Z. & Li, J. A *Streptomyces morookaensis* strain promotes plant  
395 growth and suppresses Fusarium wilt of banana. *Trop. Plant Pathol.* **46**, 175-185  
396 (2020).
- 397 23. Wu, G. Y. et al. Chemical constituents from the *Streptomyces morookaensis* strain  
398 Sm4-1986. *Nat. Prod. Res.* <https://doi:10.1080/14786419.2021.1881095> (2021).
- 399 24. Liu, S. et al. Fusaric acid instigates the invasion of banana by *Fusarium oxysporum*  
400 f. sp. *ubense* TR4. *New Phytol.* **225**, 913-929 (2020).
- 401 25. Unnikumar, K. R., Sree, K. S. & Varma, A. *Piriformospora indica*: a versatile root  
402 endophytic symbiont. *Symbiosis* **60**, 107-113 (2013).
- 403 26. Dong, H. et al. Histological and gene expression analyses in banana reveals the  
404 pathogenic differences between races 1 and 4 of banana Fusarium wilt pathogen.  
405 *Phytopathology* **109**, 1029-1042 (2019).
- 406 27. Hernandez-Apaolaza, L. & Lucena, L. L. Influence of irradiation time and solution

- 407 concentration on the photochemical degradation of EDDHA/Fe<sup>3+</sup>: effect of its  
408 photodecomposition products on soybean growth. *J. Sci. Food Agric.* **91**, 2024-  
409 2030 (2011).
- 410 28. Kovacs, K. et al. Revisiting the iron pools in cucumber roots: identification and  
411 localization. *Planta* **244**, 167-169 (2016).
- 412 29. Deshmukh, S. et al. The root endophytic fungus *Piriformospora indica* requires  
413 host cell death for proliferation during mutualistic symbiosis with barley. *Proc.*  
414 *Natl Acad. Sci. USA* **103**, 18450–18457 (2006).
- 415 30. Sirrenberg, A. et al. *Piriformospora indica* affects plant growth by auxin  
416 production. *Physiol. Plantarum* **131**, 581-589 (2007).
- 417 31. Varma, A., Kost, G. & Oelmüller, R. *Piriformospora indica* (Springer-Verlag  
418 Berlin Heidelberg, 2013).
- 419 32. Vermeer, J. E. M. et al. A spatial accommodation by neighboring cells is required  
420 for organ initiation in Arabidopsis. *Science* **343**, 178-183 (2014).
- 421 33. Wachsman, G., Zhang, J. Y., Moreno-Risueno, M. A., Anderson, C. T. & Benfey, P.  
422 N. Cell wall remodeling and vesicle trafficking mediate the root clock in  
423 Arabidopsis. Preprint at *bioRxiv* <https://doi.org/10.1101/2020.03.10.985747> (2020).
- 424 34. Scher, F. M. & Baker, R. Effect of *Pseudomonas putida* and a synthetic iron  
425 chelator on induction of soil suppressiveness of Fusarium wilt pathogens.  
426 *Phytopathology* **72**, 1567-1573 (1982).
- 427 35. Lopez-Berges, M. S. et al. Iron competition in fungus-plant interactions: The battle  
428 takes place in the rhizosphere. *Plant Signal. Behav.* **8**, e23012 (2013).
- 429 36. Gasoni, L. & de Gurfinkel, B.S. The endophyte *Cladorrhinum foecundissimum* in  
430 cotton roots: phosphorus uptake and host growth. *Mycol. Res.* **101**, 867-870 (1997).

431

## 432 **Methods**

433 **Culturing microbe.** *Piriformospora indica* was a gift from Prof. Kai-Wun Yeh of  
434 Institute of Plant Biology of National Taiwan University, Taiwan. *Streptomyces*  
435 *morookaensis* strain Sm4-1986 was purchased from China General Microbiological

436 Culture Collection Center (CGMCC# 4.1986), Beijing, China. GFP-tagged *Foc* TR4  
437 was a gift from Dr. Gan-Jun Yi of Fruit Research Institute of Guangdong Academy of  
438 Agricultural Sciences, Guangdong, China.

439 *P. indica* was propagated on PDA (potato dextrose agar). A mycelial plug (5 mm in  
440 diameter) was placed in the center of a PDA plate and cultured in an incubator at 28 °C  
441 in the dark for a week. *P. indica* on PDA plate was refreshed once a month. For liquid  
442 culture, a small mycelial plug (5 mm in diameter) was punched from mycelium margin  
443 of the stock plate and cultured in a 250 ml Erlenmeyer flask containing 100 mL PDB  
444 (potato dextrose broth) at 28 °C with a rotation speed of 200 rpm for 7 days. The culture  
445 was harvested and homogenized in a blender, and then filtered with cheese cloth. Spore  
446 number was determined using a Malassez hemocytometer and the filtrate solution was  
447 adjusted to  $1 \times 10^6$  chlamydospores/ml for use. To observe lateral root formation, we  
448 grew banana plantlets in glass bottles containing 1/2 Hoagland medium<sup>37</sup> for a month.  
449 *P. indica* inoculum of  $1 \times 10^6$  chlamydospores/ml was used to inoculate the banana  
450 plants. To observe *P. indica* colonization patterns in banana roots, we used *P. indica*  
451 solution of  $1 \times 10^5$  chlamydospores/ml. For field trials, five mycelium plugs were  
452 cultured in a 1000 ml Erlenmeyer flask containing 500 ml PDB for 10 days, and then  
453 the whole culture was collected and diluted by 5 times with water for use. Banana  
454 plantlets were placed into the solution by dipping the roots for 5 sec, and then  
455 transplanted 7 days later.

456 *S. morookaensis* strain Sm4-1986 was propagated on PDA medium at 28 °C in the  
457 dark for a week. A mycelium plug (5 mm in diameter) from the margin of a growing  
458 colony of *S. morookaensis* strain Sm4-1986 was inoculated into 200 ml PDB in a 500  
459 ml Erlenmeyer flask and cultured at 28 °C in a rotary shaker at 200 rpm for 10 days.  
460 The fermentation liquid was collected for banana plantlet inoculation. For field trials,  
461 five mycelium plugs (1 cm in diameter) were inoculated into 500 ml PDB in a 1000 ml  
462 Erlenmeyer flask and cultured at 28 °C in a rotary shaker at 200 rpm for 10 days. The  
463 whole fermentation broth was collected and diluted by 3 times with water and then  
464 applied to the field.

465 *Foc* TR4 and a GFP-tagged *Foc* TR4 displayed similar growth characteristics and  
466 virulence to bananas were used<sup>38</sup>. *Foc* TR4 was used for inoculating banana plantlets  
467 and GFP-tagged *Foc* TR4 for observing the fluorescence. *Foc* TR4 or GFP-tagged *Foc*  
468 TR4 was cultured on PDA at 28 °C in the dark for 7 days. A mycelium plug (5 mm in  
469 diameter) from the margin of a growing colony of *Foc* TR4 or GFP-tagged *Foc* TR4  
470 was put in a 250 ml Erlenmeyer flask containing 100 mL PDB and cultured at 28 °C  
471 with a rotation speed of 200 rpm for 5 days. The culture was filtered with cheese cloth,  
472 and the number of conidia in the filtrate was counted using a Malassez hemocytometer  
473 and adjusted to 1 x 10<sup>6</sup> conidia/ml for use.

474 **Banana material.** All banana plantlets used in this study are Cavendish cultivar  
475 ‘Brazilian’ banana plants (*Musa acuminata* L. AAA group)<sup>39</sup>, which were purchased  
476 from the Center of Tissue Culture, South China Botanical Garden, Guangzhou, China.  
477 Banana plantlets at different growth stages were used in different experiments.

478 **Compound isolation.** *S. morookaensis* strain 4-1986 was fermented in PDB on a large-  
479 scale at 28 °C for a week with a rotation speed of 200 rpm. Xerucitrinin A, 6-pentyl- $\alpha$ -  
480 pyrone, and other compounds were isolated from the fermentation broth. Compound  
481 classification and structure elucidation were described in detail by Wu et al.<sup>23</sup>.

482 **Interaction between *P. indica* and *Foc* TR4.** *P. indica* and *Foc* TR4 were co-cultured  
483 on a glass slide, which was first covered by a thin layer of PDA. A mycelium plug of  
484 *P. indica* was placed on one end of the glass slide that was covered by a petri dish which  
485 was then cultured in an incubator at 28 °C for 3 days. After that, a *Foc* TR4 plug was  
486 placed on the other end of the glass slide, and the petri dish was covered and incubated  
487 at 28 °C for another 4 days. During the period of cultivation, the leading hyphae of *P.*  
488 *indica* and *Foc* TR4 could meet somewhere between the two plugs. A small disc  
489 containing the overlapped hyphae of *P. indica* and *Foc* TR4 was sliced out from the  
490 place where they met and then subjected to scanning electron microscope observation<sup>40</sup>.  
491 Hyphae from the individually cultured *P. indica* and *Foc* TR4 were used as controls.

492 **Effects of XcA and 6-PP on morphology of *Foc* TR4 spores.** A plug of *Foc* TR4  
493 mycelia was cultured in 50 ml PDB in a 100 ml Erlenmeyer flask shaken in a rotary

494 shaker with 200 rpm at 28 °C for 5 days. The culture was filtered using sterile gauze,  
495 and the filtrate was centrifuged at 1000 rpm for 5 min to collect conidia, which were  
496 then resuspended in PDB and adjusted to  $1 \times 10^7$  conidia/ml. Aliquot 200  $\mu$ l of the  
497 conidial suspension into the cells of a 96-well plate. XcA or 6-PP was added to the cells  
498 containing *Foc* TR4 conidia to make up the final concentrations of 3 mM for XcA and  
499 0.96 mM for 6-PP. Each treatment was repeated three times. After 72 hr incubation at  
500 28 °C in darkness, conidia were subjected to scanning electron microscope  
501 observation<sup>41</sup>.

502 **Effects of 6-PP on ultrastructure of *Foc* TR4 spores.** *Foc* TR4 mycelia were cultured  
503 in 1000 ml PDB at 28 °C for 5 days. The culture was filtrated with sterile gauze, and  
504 the filtrate was centrifuged at 1000 rpm for 5 min to collect conidia, which were then  
505 resuspended in 1000 ml PDB and adjusted to  $1 \times 10^7$  conidia/ml. 6-PP was added to the  
506 culture making up the final concentration of 6-PP at 0.96 mM. The conidial culture was  
507 incubated at 28 °C for 24 h in darkness and then centrifuging at 3000 rpm for 10 min at  
508 4 °C to collect spores<sup>42</sup>. The collected conidia were subjected to transmission electron  
509 microscope observation.

510 **Effects of XcA and 6-PP on growth of banana plantlets.** Micro-propagated banana  
511 plantlets were grown on 1/2 MS in glass tubes containing either 3 mM XcA or different  
512 concentrations of 6-PP. The glass tubes were put in the tissue culture room at 26 °C  
513 with a photoperiod of 14/10 h light/dark. Banana plantlets were observed and  
514 photographed at the indicated time.

515 **Scanning electron microscope.** Conidial samples or mycelial discs were fixed in a  
516 solution containing 2.5% glutaraldehyde and 2% paraformaldehyde for 2 h, and then  
517 subjected to vacuum pumping to let samples sink to the bottom of tube. After that, the  
518 samples were stored in a refrigerator for 12 h. Pouring off the solution and washed  
519 samples three times with 0.1 M phosphate buffer (80 g NaCl, 32.3 g Na<sub>2</sub>HPO<sub>4</sub>·12H<sub>2</sub>O,  
520 and 4.5 g NaH<sub>2</sub>PO<sub>4</sub>·2H<sub>2</sub>O in 1000 ml ddH<sub>2</sub>O, pH 7.2) at 4 °C; 40 min per washing.  
521 Washed samples were vapor-fixed with 1% (w/v) aqueous osmium tetroxide for 2.5 h  
522 at room temperature, and then followed by washing three times with 0.1 M phosphate

523 buffer at 4 °C, and each time for 5 min. After washing, samples were subjected to  
524 gradient dehydration in different concentrations of ethanol as in the order of 30%, 50%,  
525 70%, 80%, and 90% at 4 °C; each for 10 min, and finally kept in 100% ethanol for 50  
526 min. At the end of dehydration, samples were dried in a critical point dryer (Leica EM  
527 CPD300, Germany). The dried samples were sputter-coated with gold palladium in a  
528 sputter coater (Leica EM ACE600, Germany)<sup>42</sup>. Conidial or hyphae morphology of  
529 *Foc* TR4 or *P. indica* was observed by SEM (JSM-6360LV, Japan).

530 **Transmission electron microscope.** 6-PP-treated *Foc* TR4 spores were fixed in the  
531 solution containing 2.5% glutaraldehyde and 2% paraformaldehyde for 3 h. The  
532 samples were then washed four times with 0.1 M phosphate buffer (80 g NaCl, 32.3 g,  
533 Na<sub>2</sub>HPO<sub>4</sub>·12H<sub>2</sub>O, and 4.5 g NaH<sub>2</sub>PO<sub>4</sub>·2H<sub>2</sub>O in 1000 ml ddH<sub>2</sub>O, pH 7.2); 15 min for  
534 each time, and then washed twice again with 0.1 M phosphate buffer; 30 min for each.  
535 Washed samples were post-fixed in 1.0% osmium tetroxide (in 0.1 M phosphate buffer)  
536 for 4 h. The fixed samples were washed six times again with 0.1 M phosphate buffer for  
537 a period of 2 h. During this period, the washing buffer was changed every 15 min for  
538 the first four washing times and 30 min for the last two times. After washing, samples  
539 were pre-stained with 0.5% uranyl acetate (in 0.1 M phosphate buffer) for overnight.  
540 All the above steps were carried out at 4 °C.

541 On the next day, spore samples were washed six times with 0.1 M phosphate buffer  
542 at 4 °C; 15 min for the first 4 times and 30 min for the last two times. After washing,  
543 samples were dehydrated in gradient ethanol solutions (30%, 50%, 70%, 80%, 90%) at  
544 room temperature (RT) for 20 min each, and final in 100% ethanol for 30 min with one  
545 change. After dehydration, samples were passed in three changes of epoxypropane:  
546 epikote 812 (3:1 for 30 min, 1:1 for 60 min, and 1:3 for 150 min) at RT, and then in  
547 epikote 812 at RT for 3 h. Finally, samples were kept in fresh epikote 812 for overnight.  
548 In next day, samples were kept in fresh epikote 812 at RT for 7 h, and then were picked  
549 up to put in a small plastic box containing epikote 812. Samples were hardened in an  
550 oven at 60 °C for 12 h. Finally, the hardened blocks containing samples were sectioned  
551 into ultrathin sections of about 70 nm<sup>43</sup>, which were observed under a transmission

552 electron microscope (Tecnai G2 SpiriBio TWIN).

553 **Colonization pattern of *P. indica* in banana roots.** Banana plantlets were cultured in  
554 1/2 Hoagland medium<sup>37</sup> containing *P. indica* at the concentration of  $1 \times 10^5$   
555 chlamydospores/ml for two weeks. Banana roots were harvested and washed  
556 thoroughly with running tap water, and then cut into 1 cm segments, which were stained  
557 with 0.01% acid fuchsin-lactic acid for 5 min and destained in lactic acid for 1 min, and  
558 then sectioned with an automatic vibrating slicing machine (Leica VT1200S,  
559 Germany)<sup>44</sup>. The sections were observed under an optical microscope (Leica DMI3000,  
560 Germany) and images were taken.

561 **Greenhouse experiments.** Experiments with banana plantlets in pots were carried out  
562 in greenhouse at 25 °C/18 °C (day/night) with a photoperiod of 14 h /10 h (light/dark).  
563 Prior to inoculation, all plantlets were maintained in greenhouse for a week to adapt  
564 environments. Plantlets with similar size were selected for inoculation. Each treatment  
565 contained 15 plantlets and was repeated three times. To inoculate plantlets, 50 ml  
566 inoculum were used for each pot. *P. indica* of  $1 \times 10^6$  chlamydospores/ml or *Foc* TR4  
567 of  $1 \times 10^6$  conidia/ml was used for inoculation. 8QH was used at the concentration of  
568 200 µM. After inoculation, banana plantlets were observed at the indicated time.

569 **Field trials.** The field trials were carried out in a land of 0.8 hectares in Longmen  
570 County (23°72'77"N, 114°25'49"E), Huizhou City, Guangdong Province, China. The  
571 small farmer had planted banana (Brazilian variety) in the land for more than 10 years  
572 and recently abandoned it because of the high incidence of Fusarium wilt caused by  
573 *Foc* TR4. Fifteen plants in a line were treated as a block, and the treatment and control  
574 blocks were arranged alternately in field. Banana transplantation holes of the treatment  
575 block were treated with *S. morookaensis* strain 4-1986 a week before transplantation.  
576 On the other hand, banana plants at the seven-leaf stage were treated with *P. indica* by  
577 submerging the roots into the inoculation solution. Banana transplantation was carried  
578 out in late February 2019. In the following days, standard irrigation and fertilization  
579 practices were applied to banana plants, and other managements were followed the  
580 normal farm operations in banana orchard. At the end of the year, external symptoms

581 of Fusarium wilt disease were investigated<sup>45</sup>. Plants showing external symptom of leaf  
582 chlorosis were cut down, and the pseudostems were chopped off to examine the internal  
583 symptoms<sup>46</sup>. The sites were treated with *S. morookaensis* strain 4-1986 again. New  
584 banana plants were treated with *P. indica* and transplanted into the treated hotspots in  
585 2020. Fusarium wilt disease incidence of bananas plants was investigated at the end of  
586 the year. External and internal symptoms were examined to determine whether the  
587 plants were actually infected by *Foc* TR4.

588 **Soil property analysis.** Soil samples were collected from the evenly distributed four  
589 sites around a plant. pH values of each sample (soil material : distilled water = 1 : 10,  
590 w/v) were measured three times using a pH meter (PHS-25, Shanghai Inesa Instrument  
591 Co. Ltd., China). Total nitrogen (TN), total phosphorus (TP), and total ferrum (TF) were  
592 detected using an Elemental analyzer (PE2400, PerkinElmer, USA).

593 **Rhizosphere microbial Illumina MiSeq sequencing.** Rhizosphere soils were  
594 collected from the roots that were obtained from the evenly distributed four sites around  
595 a plant. The bacterial community composition of the rhizosphere soil was assessed by  
596 sequencing the V3-V4 region of the 16S rRNA gene using the universal primers  
597 338F/806R (forward primers 5' -ACTCCTACGGGAGGCAGCA-3' and reverse  
598 primers 5' -GGACTACGCGGTATCTAAT-3'). The fungal ITS1 region was amplified  
599 using primer set ITS1 (5'-GGAAGTAAAAGTCGTAACAAGG-3') and ITS2 (5'-  
600 GCTGCGTTCTTCATCGATGC-3')<sup>47</sup>. The PCR reactions were carried out in a 50 µL  
601 reaction mixture containing 1.5 µL each primer, 1 µL dNTP, 10 µL Buffer, 0.2 µL Q5  
602 High Fidelity DNA Polymerase, 10 µL High GC Enhancer and 40 ng soil DNA template.  
603 The PCR conditions for bacteria were initiated at 95 °C for 3 min, followed by 25 cycles  
604 of denaturation at 95 °C for 45 s, annealing at 50 °C for 45 s, and extension at 68 °C  
605 for 90 s, followed by a final elongation at 68 °C for 7 min, and then held at 4 °C. The  
606 PCR conditions for fungi were initiated at 98 °C for 2 min, followed by 30 cycles of  
607 denaturation at 98 °C for 30 s, annealing at 50 °C for 30 s, and extension at 72 °C for 1  
608 min, followed by a final elongation at 72 °C for 5 min, and then held at 4 °C. The PCR  
609 products were pooled and visualized on 1.8% agarose gels, purified using a MinElute®



610 PCR Purification Kit according to the manufacturer's instructions, and quantified using  
611 QuantiFluor™-ST (Promega, USA).

612 High-throughput sequencing was carried out on the Illumina MiSeq platform  
613 (BioMarker Technologies Co. Ltd, China). After pyrosequencing, raw sequences were  
614 processed with Prinseq (PRINSEQlite 0.19.5) to remove low-quality data and improve  
615 the syncretic rates of the subsequent sequence. Split sequences for each sample were  
616 merged using FLASH V1.2.7<sup>48</sup>. Using Usearch with a cut-off of 97% similarity, the  
617 OTUs were clustered and the taxonomic classification was performed using RDP  
618 Classifier (Version 2.2, based on Bergey's taxonomy) with the classification threshold  
619 set at 0.8. The sequences were taxonomically identified by a BLASTn search of a  
620 curated NCBI database.

621 **Statistical analysis.** All data analyses were analyzed using the SPSS 20.0 program  
622 (SPSS Inc., USA), and the significance between treatments was assigned at  $P < 0.05$   
623 using a one-way analysis of variance (ANOVA) with LSD test. Alpha diversity indices,  
624 including Chao 1, ACE, and Shannon, were calculated using the OTU table in QIIME<sup>48</sup>.

625 The soil microbiome composition was ordinated by principal coordinates analysis  
626 (PCoA) using bray-curtis distance. Differences between microbiome composition of  
627 healthy and diseased plants were calculated by using PERMANOVA and ANOSIM.  
628 Bray-curtis distances are sensitive to rare OTUs and thus emphasize differences in the  
629 presence or absence of taxa<sup>49</sup>. R package (v3.2.0) was used to draw the graph of  
630 redundancy analysis (RDA).

631 Linear discriminant analysis was used to explore the most discriminating OTUs  
632 between health and diseased conditions using LEfSe<sup>50</sup>. Two screening criteria were  
633 used: (1) linear discriminant analysis with a score of  $\geq 3.0$  (healthy condition relative  
634 to diseased condition) and (2) significance test with  $P < 0.05$ .

635 We also used the NetShift method to identify potential keystone driver taxa based  
636 on differences in network interactions between healthy and diseased plant microbiome  
637 (<https://web.rniapps.net/netshift>)<sup>51</sup>.

638

639

640 **Accession numbers for sequence data.** Accession numbers of the rhizosphere microbiome

641 data determined at the end of the field experiment in 2019 (33 samples, paired end reads).

| treatment  | Bacterial    |                    |                    | Fungi        |                    |                    |
|------------|--------------|--------------------|--------------------|--------------|--------------------|--------------------|
|            | Accession no | Paired end read 1  | Paired end read 2  | Accession no | Paired end read 1  | Paired end read 2  |
| Diseased   | SAMN27606370 | abDiseased1_1.fq   | abDiseased1_2.fq   | SAMN27606453 | afDiseased1_1.fq   | afDiseased1_2.fq   |
| Diseased   | SAMN27606371 | abDiseased2_1.fq   | abDiseased2_2.fq   | SAMN27606454 | afDiseased2_1.fq   | afDiseased2_2.fq   |
| Diseased   | SAMN27606372 | abDiseased3_1.fq   | abDiseased3_2.fq   | SAMN27606455 | afDiseased3_1.fq   | afDiseased3_2.fq   |
| Healthy    | SAMN27606373 | abHealthy1_1.fq    | abHealthy1_2.fq    | SAMN27606456 | afHealthy1_1.fq    | afHealthy1_2.fq    |
| Healthy    | SAMN27606374 | abHealthy2_1.fq    | abHealthy2_2.fq    | SAMN27606457 | afHealthy2_1.fq    | afHealthy2_2.fq    |
| Healthy    | SAMN27606375 | abHealthy3_1.fq    | abHealthy3_2.fq    | SAMN27606458 | afHealthy3_1.fq    | afHealthy3_2.fq    |
| Biotreated | SAMN27606376 | abBiotreated1_1.fq | abBiotreated1_2.fq | SAMN27606459 | afBiotreated1_1.fq | afBiotreated1_2.fq |
| Biotreated | SAMN27606377 | abBiotreated2_1.fq | abBiotreated2_2.fq | SAMN27606460 | afBiotreated2_1.fq | afBiotreated2_2.fq |
| Biotreated | SAMN27606378 | abBiotreated3_1.fq | abBiotreated3_2.fq | SAMN27606461 | afBiotreated3_1.fq | afBiotreated3_2.fq |
| Diseased   | SAMN27605964 | abA01_1.fq         | abA01_2.fq         | SAMN27606065 | afA01_1.fq         | afA01_2.fq         |
| Diseased   | SAMN27605965 | abA02_1.fq         | abA02_2.fq         | SAMN27606066 | afA02_1.fq         | afA02_2.fq         |
| Diseased   | SAMN27605966 | abA03_1.fq         | abA03_2.fq         | SAMN27606067 | afA03_1.fq         | afA03_2.fq         |
| Diseased   | SAMN27605967 | abA04_1.fq         | abA04_2.fq         | SAMN27606068 | afA04_1.fq         | afA04_2.fq         |
| Diseased   | SAMN27605968 | abA05_1.fq         | abA05_2.fq         | SAMN27606069 | afA05_1.fq         | afA05_2.fq         |
| Diseased   | SAMN27605969 | abA06_1.fq         | abA06_2.fq         | SAMN27606070 | afA06_1.fq         | afA06_2.fq         |
| Diseased   | SAMN27605970 | abA07_1.fq         | abA07_2.fq         | SAMN27606071 | afA07_1.fq         | afA07_2.fq         |
| Diseased   | SAMN27605971 | abA08_1.fq         | abA08_2.fq         | SAMN27606072 | afA08_1.fq         | afA08_2.fq         |
| Diseased   | SAMN27605972 | abA09_1.fq         | abA09_2.fq         | SAMN27606073 | afA09_1.fq         | afA09_2.fq         |
| Diseased   | SAMN27605973 | abA10_1.fq         | abA10_2.fq         | SAMN27606074 | afA10_1.fq         | afA10_2.fq         |
| Diseased   | SAMN27605974 | abA11_1.fq         | abA11_2.fq         | SAMN27606075 | afA11_1.fq         | afA11_2.fq         |
| Diseased   | SAMN27605975 | abA12_1.fq         | abA12_2.fq         | SAMN27606076 | afA12_1.fq         | afA12_2.fq         |
| Healthy    | SAMN27605976 | abB01_1.fq         | abB01_2.fq         | SAMN27606077 | afB01_1.fq         | afB01_2.fq         |
| Healthy    | SAMN27605977 | abB02_1.fq         | abB02_2.fq         | SAMN27606078 | afB02_1.fq         | afB02_2.fq         |
| Healthy    | SAMN27605978 | abB03_1.fq         | abB03_2.fq         | SAMN27606079 | afB03_1.fq         | afB03_2.fq         |
| Healthy    | SAMN27605979 | abB04_1.fq         | abB04_2.fq         | SAMN27606080 | afB04_1.fq         | afB04_2.fq         |
| Healthy    | SAMN27605980 | abB05_1.fq         | abB05_2.fq         | SAMN27606081 | afB05_1.fq         | afB05_2.fq         |
| Healthy    | SAMN27605981 | abB06_1.fq         | abB06_2.fq         | SAMN27606082 | afB06_1.fq         | afB06_2.fq         |
| Healthy    | SAMN27605982 | abB07_1.fq         | abB07_2.fq         | SAMN27606083 | afB07_1.fq         | afB07_2.fq         |
| Healthy    | SAMN27605983 | abB08_1.fq         | abB08_2.fq         | SAMN27606084 | afB08_1.fq         | afB08_2.fq         |
| Healthy    | SAMN27605984 | abB09_1.fq         | abB09_2.fq         | SAMN27606085 | afB09_1.fq         | afB09_2.fq         |
| Healthy    | SAMN27605985 | abB10_1.fq         | abB10_2.fq         | SAMN27606086 | afB10_1.fq         | afB10_2.fq         |
| Healthy    | SAMN27605986 | abB11_1.fq         | abB11_2.fq         | SAMN27606087 | afB11_1.fq         | afB11_2.fq         |
| Healthy    | SAMN27605987 | abB12_1.fq         | abB12_2.fq         | SAMN27606088 | afB12_1.fq         | afB12_2.fq         |

642

643

644

645

646

647 Accession numbers of the rhizosphere microbiome data determined at the end of the field  
 648 experiment in 2020 (33 samples, paired end reads).

| treatment  | Bacterial    |                    |                    | Fungi        |                    |                    |
|------------|--------------|--------------------|--------------------|--------------|--------------------|--------------------|
|            | Accession no | Paired end read 1  | Paired end read 2  | Accession no | Paired end read 1  | Paired end read 2  |
| Diseased   | SAMN27606490 | bbDiseased1_1.fq   | bbDiseased1_2.fq   | SAMN27606507 | bfDiseased1_1.fq   | bfDiseased1_2.fq   |
| Diseased   | SAMN27606491 | bbDiseased2_1.fq   | bbDiseased2_2.fq   | SAMN27606508 | bfDiseased2_1.fq   | bfDiseased2_2.fq   |
| Diseased   | SAMN27606492 | bbDiseased3_1.fq   | bbDiseased3_2.fq   | SAMN27606509 | bfDiseased3_1.fq   | bfDiseased3_2.fq   |
| Healthy    | SAMN27606493 | bbHealthy1_1.fq    | bbHealthy1_2.fq    | SAMN27606510 | bfHealthy1_1.fq    | bfHealthy1_2.fq    |
| Healthy    | SAMN27606494 | bbHealthy2_1.fq    | bbHealthy2_2.fq    | SAMN27606511 | bfHealthy2_1.fq    | bfHealthy2_2.fq    |
| Healthy    | SAMN27606495 | bbHealthy3_1.fq    | bbHealthy3_2.fq    | SAMN27606512 | bfHealthy3_1.fq    | bfHealthy3_2.fq    |
| Biotreated | SAMN27606496 | bbBiotreated1_1.fq | bbBiotreated1_2.fq | SAMN27606513 | bfBiotreated1_1.fq | bfBiotreated1_2.fq |
| Biotreated | SAMN27606497 | bbBiotreated2_1.fq | bbBiotreated2_2.fq | SAMN27606514 | bfBiotreated2_1.fq | bfBiotreated2_2.fq |
| Biotreated | SAMN27606498 | bbBiotreated3_1.fq | bbBiotreated3_2.fq | SAMN27606515 | bfBiotreated3_1.fq | bfBiotreated3_2.fq |
| Diseased   | SAMN27606096 | bbA01_1.fq         | bbA01_2.fq         | SAMN27606338 | bfA01_1.fq         | bfA01_2.fq         |
| Diseased   | SAMN27606097 | bbA02_1.fq         | bbA02_2.fq         | SAMN27606339 | bfA02_1.fq         | bfA02_2.fq         |
| Diseased   | SAMN27606098 | bbA03_1.fq         | bbA03_2.fq         | SAMN27606340 | bfA03_1.fq         | bfA03_2.fq         |
| Diseased   | SAMN27606099 | bbA04_1.fq         | bbA04_2.fq         | SAMN27606341 | bfA04_1.fq         | bfA04_2.fq         |
| Diseased   | SAMN27606100 | bbA05_1.fq         | bbA05_2.fq         | SAMN27606342 | bfA05_1.fq         | bfA05_2.fq         |
| Diseased   | SAMN27606101 | bbA06_1.fq         | bbA06_2.fq         | SAMN27606343 | bfA06_1.fq         | bfA06_2.fq         |
| Diseased   | SAMN27606102 | bbA07_1.fq         | bbA07_2.fq         | SAMN27606344 | bfA07_1.fq         | bfA07_2.fq         |
| Diseased   | SAMN27606103 | bbA08_1.fq         | bbA08_2.fq         | SAMN27606345 | bfA08_1.fq         | bfA08_2.fq         |
| Diseased   | SAMN27606104 | bbA09_1.fq         | bbA09_2.fq         | SAMN27606346 | bfA09_1.fq         | bfA09_2.fq         |
| Diseased   | SAMN27606105 | bbA10_1.fq         | bbA10_2.fq         | SAMN27606347 | bfA10_1.fq         | bfA10_2.fq         |
| Diseased   | SAMN27606106 | bbA11_1.fq         | bbA11_2.fq         | SAMN27606348 | bfA11_1.fq         | bfA11_2.fq         |
| Diseased   | SAMN27606107 | bbA12_1.fq         | bbA12_2.fq         | SAMN27606349 | bfA12_1.fq         | bfA12_2.fq         |
| Healthy    | SAMN27606108 | bbB01_1.fq         | bbB01_2.fq         | SAMN27606350 | bfB01_1.fq         | bfB01_2.fq         |
| Healthy    | SAMN27606109 | bbB02_1.fq         | bbB02_2.fq         | SAMN27606351 | bfB02_1.fq         | bfB02_2.fq         |
| Healthy    | SAMN27606110 | bbB03_1.fq         | bbB03_2.fq         | SAMN27606352 | bfB03_1.fq         | bfB03_2.fq         |
| Healthy    | SAMN27606111 | bbB04_1.fq         | bbB04_2.fq         | SAMN27606353 | bfB04_1.fq         | bfB04_2.fq         |
| Healthy    | SAMN27606112 | bbB05_1.fq         | bbB05_2.fq         | SAMN27606354 | bfB05_1.fq         | bfB05_2.fq         |
| Healthy    | SAMN27606113 | bbB06_1.fq         | bbB06_2.fq         | SAMN27606355 | bfB06_1.fq         | bfB06_2.fq         |
| Healthy    | SAMN27606114 | bbB07_1.fq         | bbB07_2.fq         | SAMN27606356 | bfB07_1.fq         | bfB07_2.fq         |
| Healthy    | SAMN27606115 | bbB08_1.fq         | bbB08_2.fq         | SAMN27606357 | bfB08_1.fq         | bfB08_2.fq         |
| Healthy    | SAMN27606116 | bbB09_1.fq         | bbB09_2.fq         | SAMN27606358 | bfB09_1.fq         | bfB09_2.fq         |
| Healthy    | SAMN27606117 | bbB10_1.fq         | bbB10_2.fq         | SAMN27606359 | bfB10_1.fq         | bfB10_2.fq         |
| Healthy    | SAMN27606118 | bbB11_1.fq         | bbB11_2.fq         | SAMN27606360 | bfB11_1.fq         | bfB11_2.fq         |
| Healthy    | SAMN27606119 | bbB12_1.fq         | bbB12_2.fq         | SAMN27606361 | bfB12_1.fq         | bfB12_2.fq         |

649

650

651

652

653

654 **References**

- 655 37. Hoagland, D.R. & Arnon, I. The water-culture method for growing plants without  
656 soil. *Calif. Agric. Exp. Stat. Circ.* **347**, 1-32 (1950).
- 657 38. Li, C.Y. et al. Transcriptome profiling of resistant and susceptible Cavendish  
658 banana roots following inoculation with *Fusarium oxysporum* f. sp. *cubense*  
659 tropical race 4. *BMC Genomics* **13**, 374 (2012).
- 660 39. Dong, H. H., Li, Y. F., Fan, H. Y., Zhou, D. B. & Li, H. P. Quantitative proteomics  
661 analysis reveals resistance differences of banana cultivar ‘Brazilian’ to *Fusarium*  
662 *oxysporum* f. sp. *cubense* races 1 and 4. *J. Proteomics* **203**, 103376 (2019).
- 663 40. Rabiey, M., Ullah, I. & Shaw, M. W. The endophytic fungus *Piriformospora indica*  
664 protects wheat from *Fusarium* crown rot disease in simulated UK autumn  
665 conditions. *Plant Pathol.* **64**, 1-12 (2015).
- 666 41. Zuo, C. et al. The toxic mechanism and bioactive components of Chinese leek root  
667 exudates acting against *Fusarium oxysporum* f. sp. *cubense* tropical race 4. *Eur. J.*  
668 *Plant Pathol.* **143**, 447-460 (2015).
- 669 42. Benhamou, N., Rey, P., Picard, K. & Tirilly, Y. Ultrastructural and cytochemical  
670 aspects of the interaction between the mycoparasite *Pythium oligandrum* and  
671 soilborne plant pathogens. *Phytopathology* **89**, 506-517 (1999).
- 672 43. Xing, F. et al. Growth inhibition and morphological alterations of *Fusarium*  
673 *verticillioides* by cinnamon oil and cinnamaldehyde. *Food Control* **46**, 343-350  
674 (2014).
- 675 44. Brundrett, M. *Methods in Mycorrhiza Research*. (Mycologue Publications, 1994).
- 676 45. Ploetz, R. C., Haynes, J. L. & Vasquez, A. Responses of new banana accessions in  
677 South Florida to Panama disease. *Crop Prot.* **18**, 445-449 (1999).
- 678 46. Almadhoun, H. R. & Abu-Naser, S. S. Banana knowledge based system diagnosis  
679 and treatment. *Int. J. Acad. Pedagog. Res.* **2**, 1-11 (2018).
- 680 47. Feng, J. et al. *Streptomyces griseorubens* JSD-1 promotes rice straw composting  
681 efficiency in industrial-scale fermenter: Evaluation of change in physicochemical  
682 properties and microbial community. *Bioresour. Technol.* **321**, e124465 (2021).

- 683 48. Magoc, T. & Salzberg, S.L. FLASH: fast length adjustment of short reads to  
684 improve genome assemblies. *Bioinformatics* **27**, 2957-2963 (2011).
- 685 49. Peiffer, J. A. et al. Diversity and heritability of the maize rhizosphere microbiome  
686 under field conditions. *Proc. Natl. Acad. Sci. USA* **110**, 6548-6553 (2013).
- 687 50. Segata, N. et al. Metagenomic biomarker discovery and explanation. *Genome Biol.*  
688 **12**, R60 (2011).
- 689 51. Kuntal, B. K., Chandrakar, K., Sadhu, S. & Mande, S. S. ‘NetShift’: A  
690 methodology for understanding ‘driver microbes’ from healthy and disease  
691 microbiome datasets. *ISME J.* **13**, 442-454 (2019)

692

### 693 **Acknowledgements**

694 We thank Prof. Kai-Wun Yeh from Institute of Plant Biology of National Taiwan  
695 University for providing *P. indica*, and Dr. Gan-Jun Yi from Fruit Research Institute  
696 of Guangdong Academy of Agricultural Sciences for providing GFP-tagged *Foc* TR4  
697 and *Foc* TR4. **Funding:** This work was supported by CAS grant Regional Key  
698 Project of Science and Technology Service Network Initiative from Chinese Academy  
699 of Sciences (No. KFJ-STIS-QYZX-044), and grant of Science and Technology  
700 Commissioner for Rural Revitalization from Guangdong Province to J.X.L. **Author**  
701 **contributions:** J.X.L. designed the study, collected data, analyzed results, and wrote  
702 the paper. Z.Y.Z performed experiments, collected data, and analyzed results. G.Y.W  
703 isolated compounds and identified structures of xerucitrinin A and 6-pentyl- $\alpha$ -pyrone.  
704 Z.Y.Z and Y.F.D performed laser confocal microscope and scanning electron  
705 microscope. Z.Y.Z and X.Y.H performed transmission electron microscope. H.B.T  
706 identified compound structure and analyzed results. Y.P.C analyzed results. Z.H.T  
707 designed the study. **Competing interests:** The authors declare no competing interests.

708

### 709 **Data availability**

710 All sequence data generated in this study have been deposited in NCBI SRA database  
711 and the accession numbers are reported in the Methods.

712

713 **Code availability**

714 All code or algorithms used in this study are published and referenced in the Methods.

715

716 **Figure Legends**

717 **Fig. 1 Antifungal activity of *S. morookaensis* strain Sm4-1986 against *Foc* TR4.** a,

718 GFP-tagged *Foc* TR4 cultured in PDB for 36 h and photographed. b, The supernatant

719 of *S. morookaensis* strain Sm4-1986 inhibits growth of *Foc* TR4. Strain Sm4-1986

720 was cultured in PDB for 10 days, and the supernatant of culture was collected and

721 added to PDB (1:1, v/v), in which GFP-tagged *Foc* TR4 was cultured for 36 h and

722 photographed. c, Structure of xerucitrinin A. d, Structure of 6-pentyl- $\alpha$ -pyrone. e,

723 Xerucitrinin A chelates iron assayed by Chrome Azurol Sulphonate (CAS). There is

724 yellow zone around the Oxford cup in the center of the plate, indicating the iron-

725 chelating ability. f, 6-PP suppresses propagation of *Foc* TR4. *Foc* TR4 and 0.96 mM

726 6-PP-treated *Foc* TR4 were cultured in PDB, respectively, and the optical densities of

727 the culture solution were monitored at the indicated time-points. Mean of triplicate

728 and standard deviation were shown. g, 6-PP treatment significantly reduces the

729 number of *Foc* TR4 spores and completely inhibits *Foc* TR4 spore germination.

730 Spores were counted using a Malassez hemocytometer at 24 h of cultivation. Mean of

731 triplicate and standard deviation was shown, \*\*,  $P < 0.01$ .

732

733 **Fig. 2 Xerucitrinin A and 6-pentyl- $\alpha$ -pyrone produced by *S. morookaensis* strain**

734 **Sm4-1986 display antifungal activity against *Foc* TR4.** a, SEM images showing the

735 morphology of *Foc* TR4 spores treated by 3 mM xerucitrinin A for 72 h. b, SEM

736 images showing the morphology of *Foc* TR4 spores treated by 0.96 mM 6-pentyl- $\alpha$ -

737 pyrone for 72 h. c, Morphology of the normal *Foc* TR4 spores analyzed by SEM. d,

738 Transmission electron microscope (TEM) image of the *Foc* TR4 spores treated by

739 0.96 mM 6-pentyl- $\alpha$ -pyrone for 24 h. e, Magnification of the squared area in (d)

740 showing a massive cytoplasm without integral organelles. The double arrow indicates

741 the thinned cell wall. f, TEM image of the normal *Foc* TR4 spores. g, Magnification

742 of the squared area in (f) showing mitochondrion (indicated by arrows). The double

743 765  
744 766  
745 767  
746 768  
747 769  
748 770  
749  
750  
751  
752  
753  
754  
755  
756  
757  
758  
759  
760  
761  
762  
763  
764

l wall. h, Response surface methodology analysis shows interaction effect of xerucitrinin A and 6-pentyl- $\alpha$ -pyrone on antifungal activity against *Foc* TR4. Scale bars in (a, b, c, d), and (f), 1  $\mu$ m; and in (e) and (g), 500 nm.

**Fig. 3 *P. indica* stimulates lateral root formation in banana plants and restricts *Foc* TR4 growth *in vitro*.** a, *P. indica* chlamydospores colonize banana roots and aggregate

at the lateral root primordium site. b, Banana plantlets treated by *P. indica*

inoculum ( $1 \times 10^5$  chlamydospores/ml) and grown in  $\frac{1}{2}$  Hoagland medium exhibit more lateral roots. Arrows indicate lateral roots. c, Untreated banana plantlets grown in  $\frac{1}{2}$  Hoagland medium as controls. d and e, Hypha size of *P. indica* (d) and *Foc* TR4 (e) under scanning electron microscope. f, *P. indica* hyphae clasp and collapse the hyphae of *Foc* TR4. Scale bars, 2  $\mu$ m.

**Fig. 4 Analyses of rhizosphere microbiome and soil property.** a and b, Principal coordinate analysis (PCoA) of bacterial community (a) and fungal community (b) in the rhizosphere soil between healthy ( $n = 12$ ) and diseased ( $n = 12$ ) plants based on the Bray-Curtis distance, showing the soil microbiomes associated with the healthy and diseased plants were clearly separated. Each symbol represents an individual. c and d, NetShift analysis to identify potential driver taxa behind pathogen suppression based on bacterial (c) and fungal (d) networks of the rhizosphere microbiome. The node sizes are proportional to their scaled NESH (neighbor shift) scores, and a node is colored red if its betweenness increased from control to case. Large and red nodes denote particularly important driver taxa behind pathogen suppression, and the taxa names are shown in red. Edge (line) is assigned between the nodes; green edges, association present only in the diseased plant microbiome; red edges, association present only in the healthy plant microbiome; and blue, association present in both diseased and healthy plant microbiomes. e and f, Redundancy analysis (RDA) investigating the relationship between bacterial (e) or fungal (f) communities and the



771 soil properties. TN, total nitrogen; TP, total phosphorus; TF, total ferrum; SM, soil  
772 moisture; dots represent individual plants ( $n = 12$ ).

773 **Fig. 5 Iron-chelating suppresses *Foc* TR4 growth and inhibits Fusarium wilt**

774 **disease of banana.** a, Addition of EDDHA (final concentration of 4 mM) suppressed  
775 growth of *Foc* TR4. b, *Foc* TR4 grew normally on PDA medium. c and d, banana  
776 plantlets grew in  $\frac{1}{2}$  MS medium with (c) or without (d) 4 mM EDDHA. e, A banana  
777 plantlet died when grew in  $\frac{1}{2}$  MS medium containing a small *Foc* TR4 medium plug,  
778 and the white arrows indicate *Foc* TR4 hyphae. f, A banana plantlet grew in  $\frac{1}{2}$  MS  
779 medium containing 4 mM EDDHA and a small *Foc* TR4 medium plug. One  
780 representative of the plantlets ( $n = 5$ ) in each treatment was taken a picture.

781

782

783

784

785

786

787

788

789

790

791

792

793

794

795

796

797

798

799

800

801

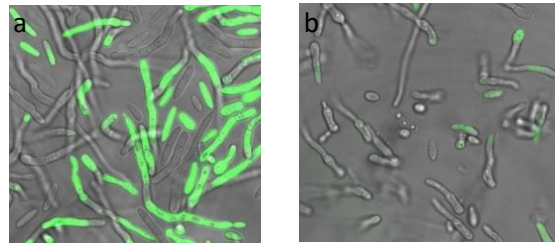

802

803

804

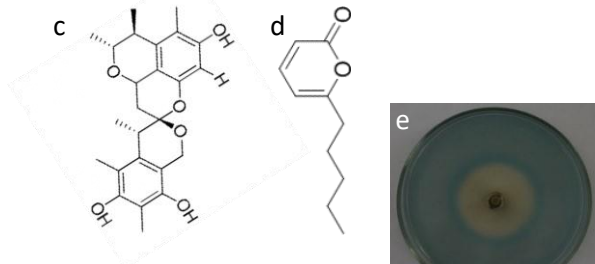

805

806

807

808

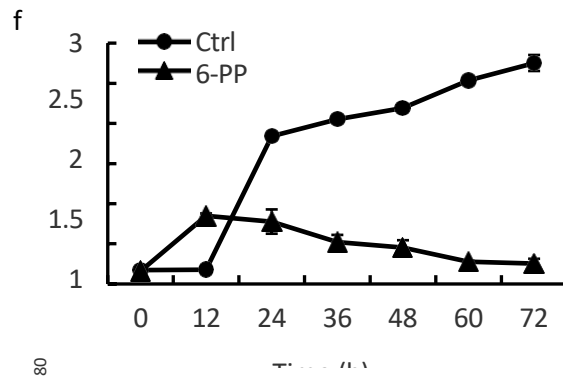

809

810

811

812

813

814

815

822

816

g

817

300

818

200

819

Number of

100

820

821

0

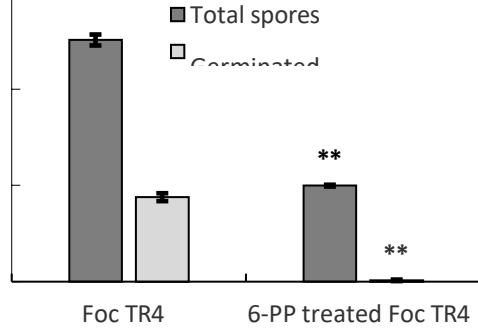

823 **Fig. 1 Antifungal activity of *S. morookaensis* strain Sm4-1986 against *Foc* TR4.** a,  
 824 GFP-tagged *Foc* TR4 cultured in PDB for 36 h and photographed. b, The supernatant  
 825 of *S. morookaensis* strain Sm4-1986 inhibits growth of *Foc* TR4. Strain Sm4-1986  
 826 was cultured in PDB for 10 days, and the supernatant of culture was collected and  
 827 added to PDB (1:1, v/v), in which GFP-tagged *Foc* TR4 was cultured for 36 h and  
 828 photographed. c, Structure of xerucitrinin A. d, Structure of 6-pentyl- $\alpha$ -pyrone. e,

829 Xerucitrinin A chelates iron assayed by Chrome Azurol Sulphonate (CAS). There is  
830 yellow zone around the Oxford cup in the center of the plate, indicating the iron-  
831 chelating ability. f, 6-PP suppresses propagation of *Foc* TR4. *Foc* TR4 and 0.96 mM  
832 6-PP-treated *Foc* TR4 were cultured in PDB, respectively, and the optical densities of  
833 the culture solution were monitored at the indicated time-points. Mean of triplicate  
834 and standard deviation were shown. g, 6-PP treatment significantly reduces the  
835 number of *Foc* TR4 spores and completely inhibits *Foc* TR4 spore germination.  
836 Spores were counted using a Malassez hemocytometer at 24 h of cultivation. Mean of  
837 triplicate and standard deviation was shown, \*\*,  $P < 0.01$ .

838

839

840

841

842

843

844

845

846

847

848

849

850

851

852

853

854

855

856

857

858

859

860

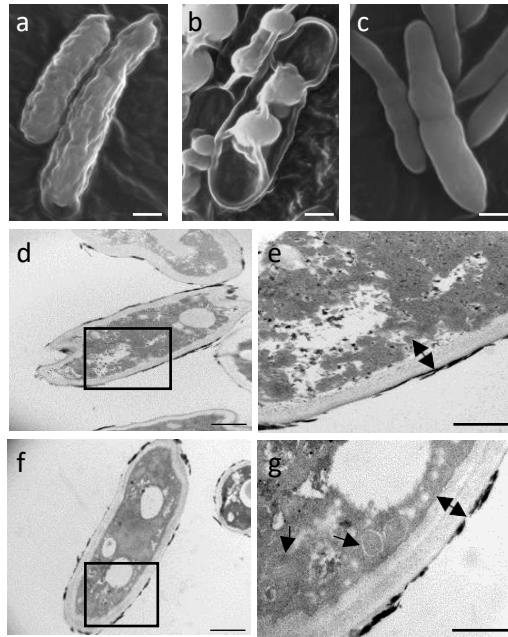

861

862

863

864

865

866

867

868

869

870

871

872

873

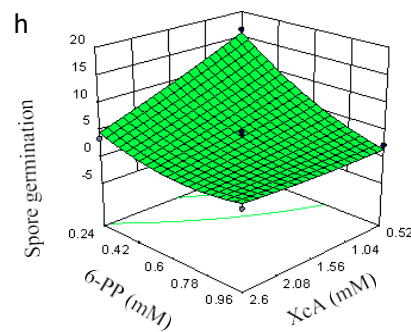

874 **Fig. 2 Xerucitrinin A and 6-pentyl- $\alpha$ -pyrone produced by *S. morookaensis* strain**

875 **Sm4-1986 display antifungal activity against *Foc* TR4.** a, SEM images showing the

876 morphology of *Foc* TR4 spores treated by 3 mM xerucitrinin A for 72 h. b, SEM images

877 showing the morphology of *Foc* TR4 spores treated by 0.96 mM 6-pentyl- $\alpha$ -pyrone for

878 72 h. c, Morphology of the normal *Foc* TR4 spores analyzed by SEM. d, Transmission

879 electron microscope (TEM) image of the *Foc* TR4 spores treated by 0.96 mM 6-pentyl-

880  $\alpha$ -pyrone for 24 h. e, Magnification of the squared area in (d) showing a massive

881 cytoplasm without integral organelles. The double arrow indicates the thinned cell wall.

882 f, TEM image of the normal *Foc* TR4 spores. g, Magnification of the squared area in (f)  
883 showing mitochondrion (indicated by arrows). The double arrow indicates the thickness  
884 of cell wall. h, Response surface methodology analysis shows interaction effect of  
885 xerucitrinin A and 6-pentyl- $\alpha$ -pyrone on antifungal activity against *Foc* TR4. Scare bars  
886 in (a, b, c, d), and (f), 1  $\mu\text{m}$ ; and in (e) and (g), 500 nm.



887

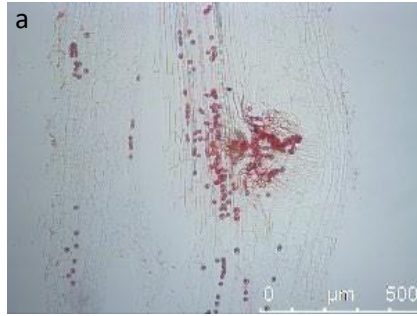

888

889

890

891

892

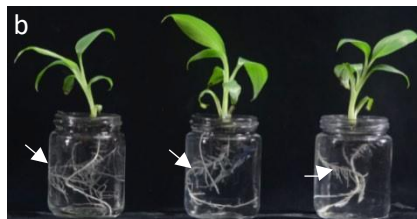

893

894

895

896

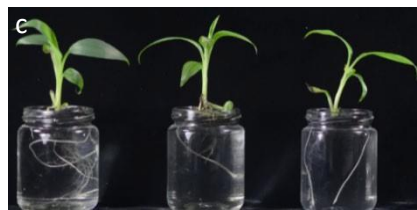

897

898

899

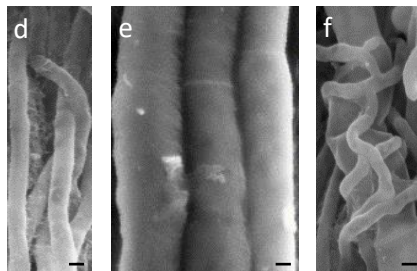

900

901

902

903

909

904

910

905

911

906

912

907

913

908

ral root formation in banana plants and restricts *Foc* TR4 growth *in vitro*. a, *P. indica*

F chlamydospores colonize banana roots and aggregate at the lateral root primordium

i site. b, Banana plantlets treated by *P. indica*

g inoculum ( $1 \times 10^5$  chlamydospores/ml) and grown in  $\frac{1}{2}$  Hoagland medium exhibit

3 more lateral roots. Arrows indicate lateral roots. c, Untreated banana plantlets grown

P in  $\frac{1}{2}$  Hoagland medium as controls. d and e, Hypha size of *P. indica* (d) and *Foc* TR4

. (e) under scanning electron microscope. f, *P. indica* hyphae clasp and collapse the  
i hyphae of *Foc* TR4. Scale bars, 2  $\mu$ m.

n

d

i

c

a

s

t

i

m

u

l

a

t

e

s

l

a

t

e

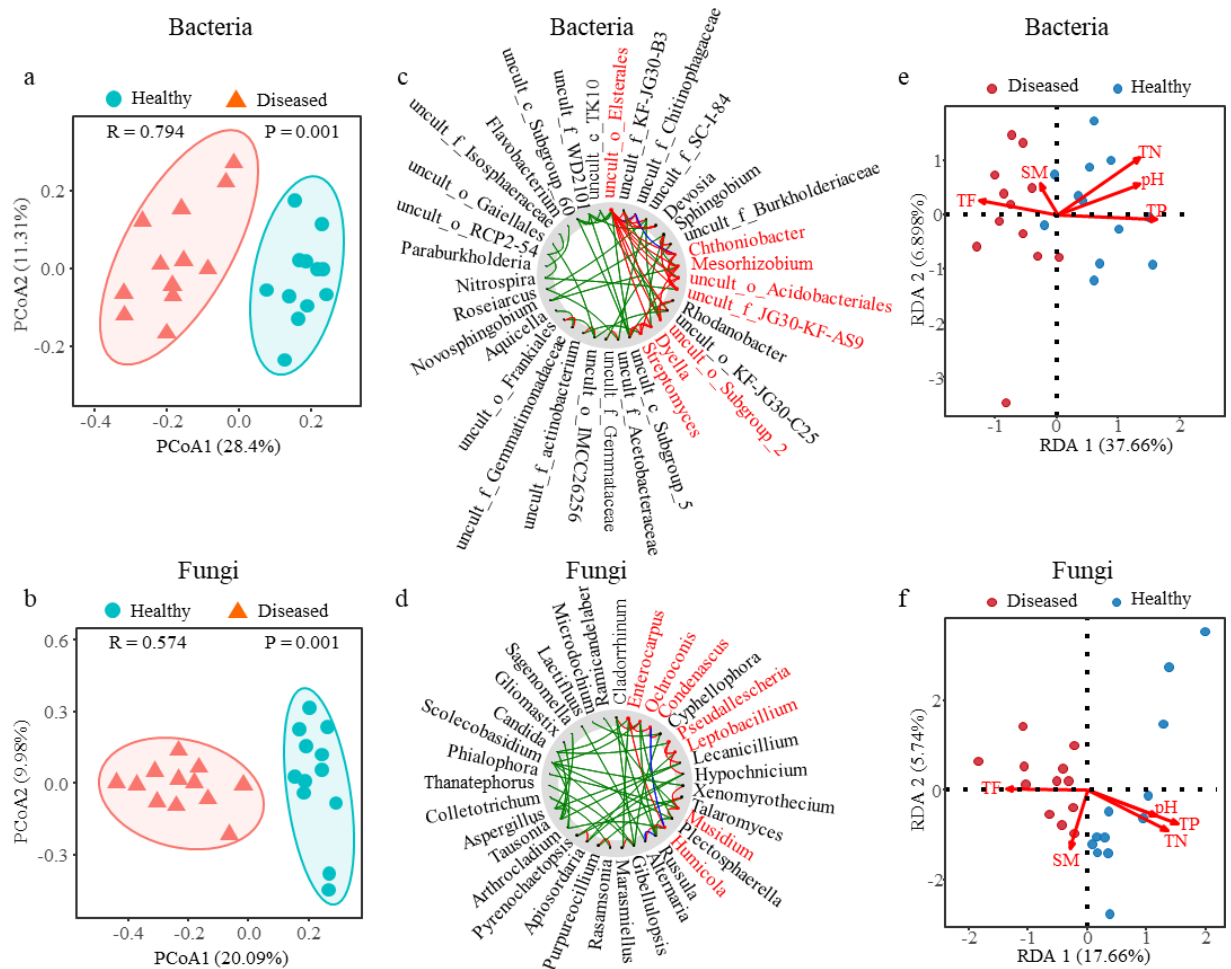

914

915 **Fig. 4 Analyses of rhizosphere microbiome and soil property.** a and b, Principal

916 coordinate analysis (PCoA) of bacterial community (a) and fungal community (b) in

917 the rhizosphere soil between healthy ( $n = 12$ ) and diseased ( $n = 12$ ) plants based on

918 the Bray-Curtis distance, showing the soil microbiomes associated with the healthy

919 and diseased plants were clearly separated. Each symbol represents an individual. c

920 and d, NetShift analysis to identify potential driver taxa behind pathogen suppression

921 based on bacterial (c) and fungal (d) networks of the rhizosphere microbiome. The

922 node sizes are proportional to their scaled NESH (neighbor shift) scores, and a node is

923 colored red if its betweenness increased from control to case. Large and red nodes

924 denote particularly important driver taxa behind pathogen suppression, and the taxa

925 names are shown in red. Edge (line) is assigned between the nodes; green edges,

926 association present only in the diseased plant microbiome; red edges, association

927 present only in the healthy plant microbiome; and blue, association present in both

928 diseased and healthy plant microbiomes. e and f, Redundancy analysis (RDA)  
929 investigating the relationship between bacterial (e) or fungal (f) communities and the  
930 soil properties. TN, total nitrogen; TP, total phosphorus; TF, total ferrum; SM, soil  
931 moisture; dots represent individual plants ( $n = 12$ ).

932

933

934

935

936

937

938

939

940

941

942

943

944

945

946

947

948

949

950

951

952

953

954

955

956

957

958

959

960

961

962

963

964

965

966

967

968

969

970

971

972

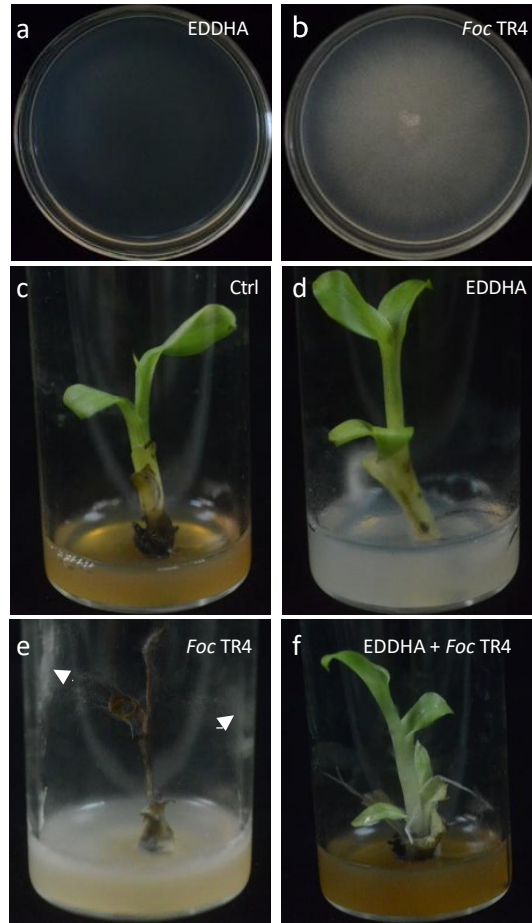

973 **Fig. 5 Iron-chelating suppresses *Foc* TR4 growth and inhibits Fusarium wilt**

974 **disease of banana.** a, Addition of EDDHA (final concentration of 4 mM) suppressed

975 growth of *Foc* TR4. b, *Foc* TR4 grew normally on PDA medium. c and d, banana

976 plantlets grew in ½ MS medium with (c) or without (d) 4 mM EDDHA. e, A banana

977 plantlet died when grew in ½ MS medium containing a small *Foc* TR4 medium plug,

978 and the white arrows indicate *Foc* TR4 hyphae. f, A banana plantlet grew in ½ MS

979 medium containing 4 mM EDDHA and a small *Foc* TR4 medium plug. One  
980 representative of the plantlets ( $n = 5$ ) in each treatment was taken a picture.  
981

Reviewer #2 (Remarks to the Author):

In this work authors studied the biocontrol mechanism of microbiome analysis against Fusarium wilt of banana (FWB) using advanced methods such GFP-tagged, TEM, SEM, and Illumina MiSeq sequencing. What I think is an interesting job, as a contribution to the solution of FW, a global issue in banana production systems. But I think in results section, it would make it easier to understand by extrapolate the results to the field settings and thus would make more sense. It would also be important to explain how the results impact small scale farmer's matrix in terms of production/ yield/ economy etc. where authors conducted field trails. Also, as authors mentioned that they got Piriformospore indica as a gift from Taiwan and Streptomyces morookaensis was purchased from Microbiological Culture Collection Center, Beijing, China which I feel require more work to examine the adaptability of these foreign strains in local soils. How long they will survive, what is the shelf life and impact on indigenous beneficial microbial communities. Similarly soil physico-chemical and biological properties should be studied more in detail and not only pH, total nitrogen (TN), total phosphorus (TP), and total ferrum (TF) and effects with microbial culture inoculations.

Manuscript review

Title: Spatiotemporal biocontrol and rhizosphere microbiome analysis of Fusarium wilt of banana

The manuscript is an interesting account of efforts towards exploring the use of *P. indica* and *S. morookaensis* as potential biocontrol agents in managing Fusarium wilt Tropical Race 4 through promotion of vigorous plant growth and secretion of secondary compounds respectively.

The manuscript title is reflective of the main ideas within the article. The introduction is systematically written and the significance of the manuscript is well explained. Although the results and conclusions are accurate and supported by the content, the authors lack a systemic presentation of this section. They need to write it out more elaborately and succinctly. The methods used in this study are appropriate. References need to be synchronized. Overall, this work is original and logical.

Specific comments were inserted directly in the manuscript.

REVIEWERS' COMMENTS:

Reviewer #2 (Remarks to the Author):

Many thanks for revisions, accepted in current form.
