# Supplementary material for: Spatiotemporal biocontrol and rhizosphere microbiome analysis of Fusarium wilt of banana
Source: PubMed Central journal article supplement (PMC9834294; doi:10.1038/s42003-023-04417-w), 2023-01-11
Supplement: 42003_2023_4417_MOESM2_ESM.pdf [file 42003_2023_4417_MOESM2_ESM.pdf]

Supplementary Figures and Tables

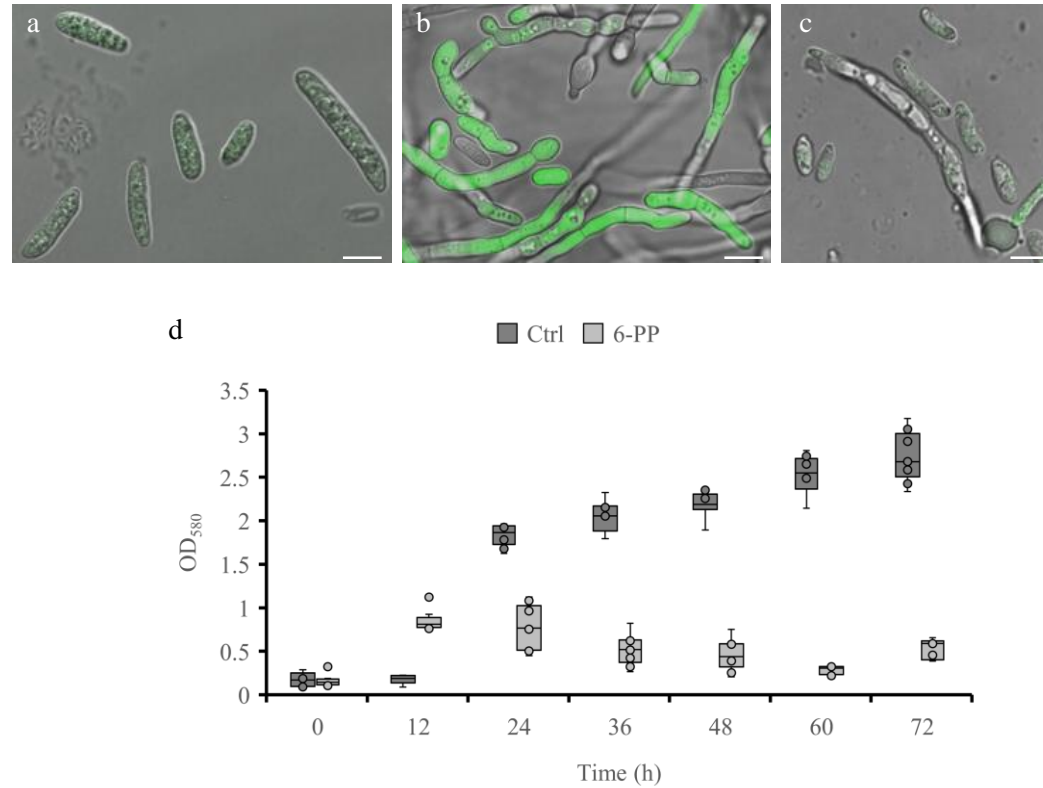

**Supplementary Figure 1. Xerucitrinin A and 6-pentyl- $\alpha$ -pyrone isolated from *S. morookaensis* Sm4-1986 show antifungal activity against *Foc* TR4.** a, GFP-tagged *Foc*TR4 was cultured in PDB containing 3 mM xerucitrinin A for 36 h, showing faded fluorescence. b, GFP-tagged *Foc*TR4 grown in PDB for 36 h showing fluorescence. c, GFP-tagged *Foc*TR4 was cultured in PDB with 0.96 mM 6-pentyl- $\alpha$ -pyrone for 36 h, showing weakened GFP fluorescence. Scale bars, 5  $\mu$ m. d, pH values of the PDB solutions with or without 0.96 mM 6-pentyl- $\alpha$ -pyrone. The mean of triplicate and the standard deviation were shown.

Supplementary Figures and Tables a

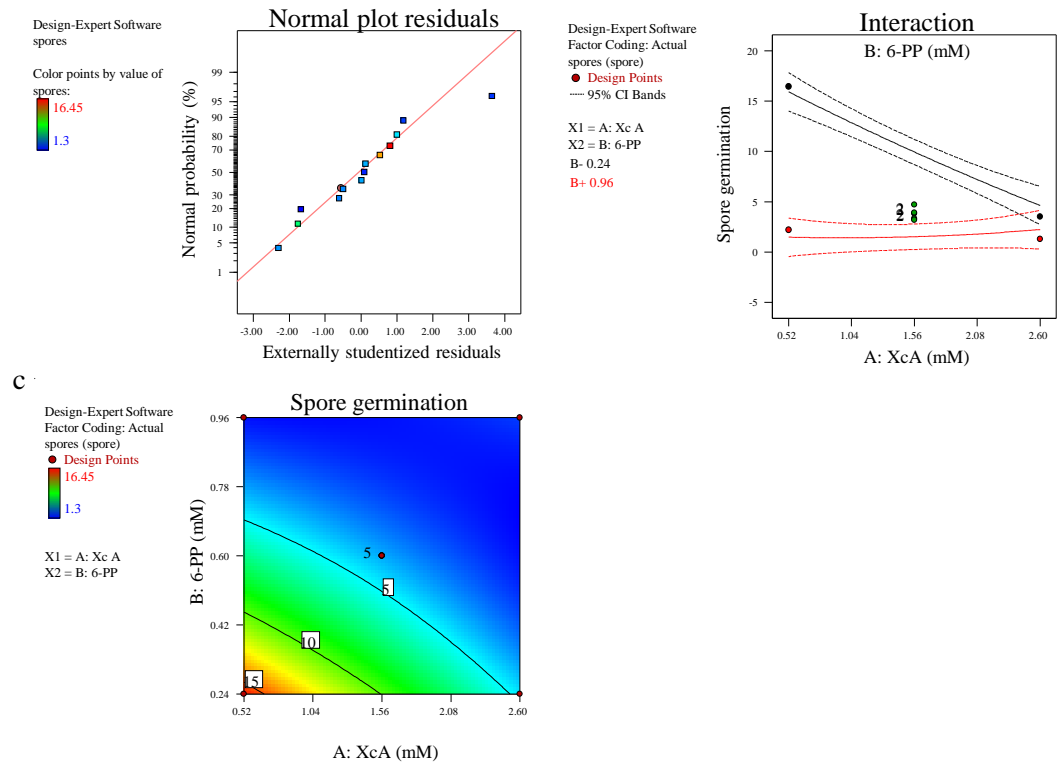

**Supplementary Figure 2. Response surface methodology analysis of the mutual enhancement of xerucitrinin A and 6-pentyl- $\alpha$ -pyrone in inhibiting *Foc* TR4 spore germination.** a, Normal probability of internally studentized residuals. b, Xerucitrinin A and 6-pentyl- $\alpha$ -pyrone interaction diagram. c, Contour plots for the effects of xerucitrinin A and 6-pentyl- $\alpha$ -pyrone on germination of *Foc* TR4 spores.

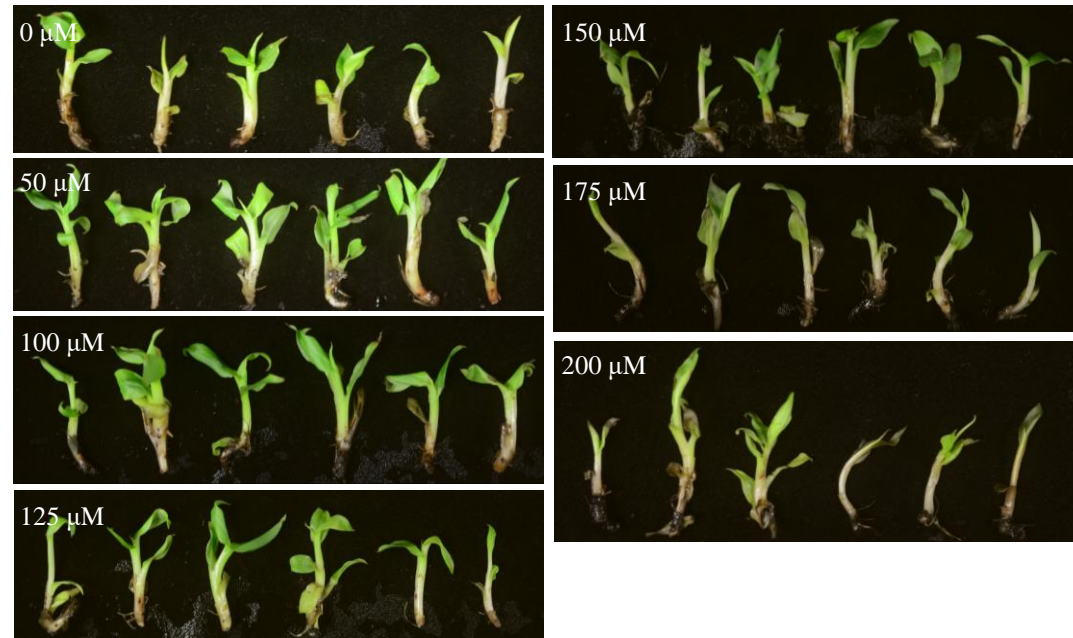

**Supplementary Figure 3. Dosage-dependent effects of 6-pentyl- $\alpha$ -pyrone on the growth of banana plantlets.** Micro-propagated banana plantlets were grown in 1/2 MS medium without or with different concentrations of 6-PP for 10 days. Low concentrations of 6-pentyl- $\alpha$ -pyrone (50-150  $\mu\text{M}$ ) promote growth of banana plantlets, whereas high concentrations of 6-pentyl- $\alpha$ -pyrone (200  $\mu\text{M}$ ) show side effects to banana plantlets.

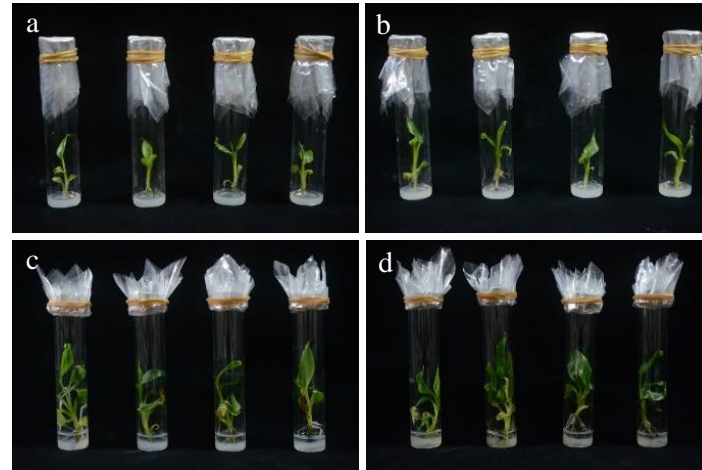

**Supplementary Figure 4. Effect of xerucitrinin A on banana plantlets.** a and b, Micro-propagated banana plantlets grown in  $\frac{1}{2}$  MS medium without 3 mM xerucitrinin A (a) and with 3 mM xerucitrinin A (b) at 0 day. c and d, Banana plantlets in (a) and (b) grown for 65 days. Equal amount of ddH<sub>2</sub>O were added to each tube during the growth period.

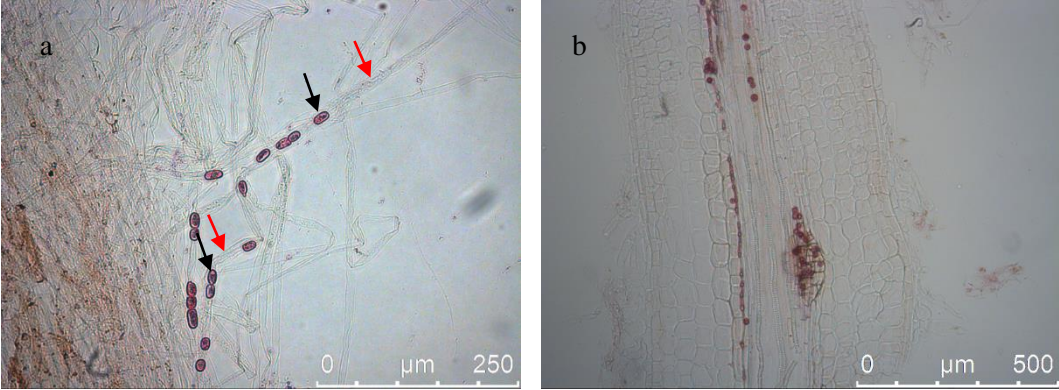

**Supplementary Figure 5. Colonization pattern of *P. indica* in banana roots.** a, *P. indica* chlamydospores (indicated by the black arrows) were observed in the root hairs (indicated by the red arrows) of banana plants. b, *P. indica* chlamydospores colonize the stele of banana roots and aggregate in the lateral root primordium initiation site.

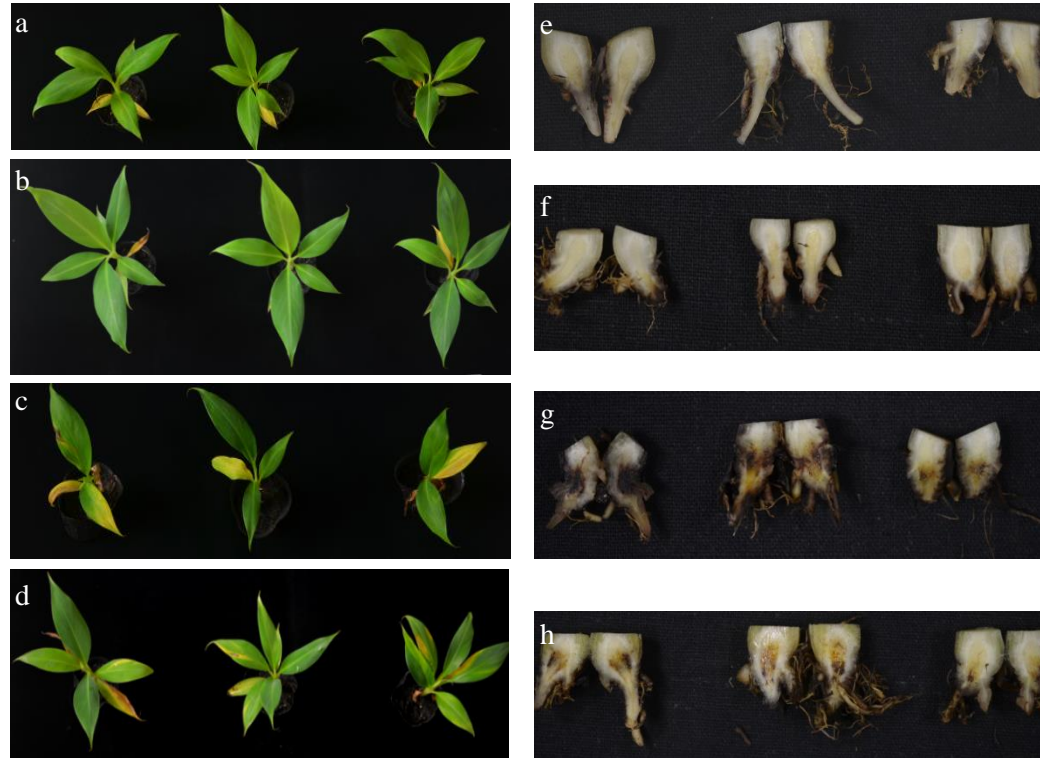

**Supplementary Figure 6. *P. indica* promotes banana growth and reduces Fusarium wilt disease symptom.** a, Cavendish banana plantlets grown in greenhouse as controls. b, Banana plantlets treated with *P. indica* ( $1 \times 10^6$  chlamydospores/ml) grew better than control plants. c, *Foc* TR4-treated banana plantlets ( $1 \times 10^6$  conidia/ml) showed Fusarium wilt symptom of leaf yellowing. d, Banana plantlets first treated by *P. indica*, and then inoculated by *Foc* TR4 one week later. The leaf yellowing symptom is reduced. e, Clean internal rhizomes of the control plants in (a). f, Clean internal rhizomes of the plants in (b). g, The internal symptom of discoloration in the rhizomes of the plants in (c). h, The internal symptom of less discoloration in the rhizomes of the plants in (d).

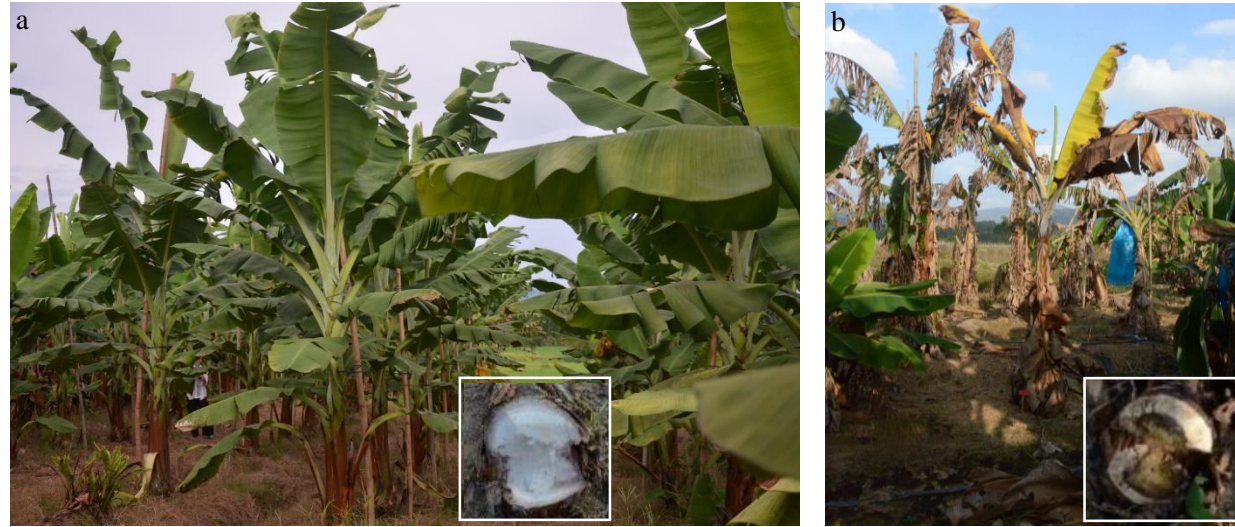

**Supplementary Figure 7. Biocontrol of FWB in the field.** a, Banana plants that were inoculated by *P. indica* and transplanted in the field treated by *S. morookaensis* strain 4-1986 did not show Fusarium wilt disease. b, Untreated banana plants that were grown in the untreated holes showed Fusarium wilt disease. The white boxed inserts showed the inside of pseudostems.

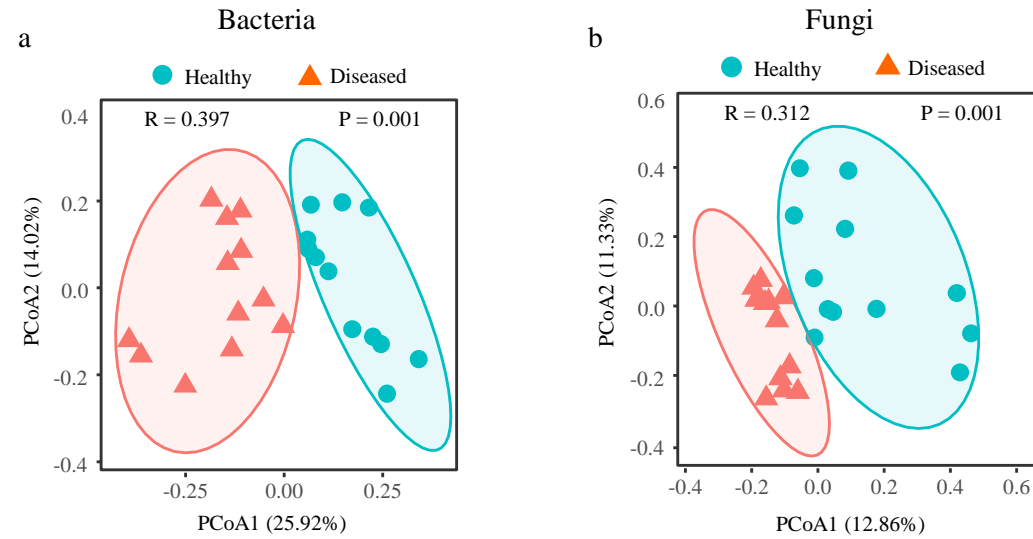

**Supplementary Figure 8. PCoA analysis of rhizosphere microbes in the first year of biocontrol.** a and b, Principal coordinate analysis (PCoA) of bacterial community (a) and fungal community (b) in the rhizosphere soil between healthy ( $n = 12$ ) and diseased ( $n = 12$ ) plants based on the Bray-Curtis distance, and each symbol represents an individual.



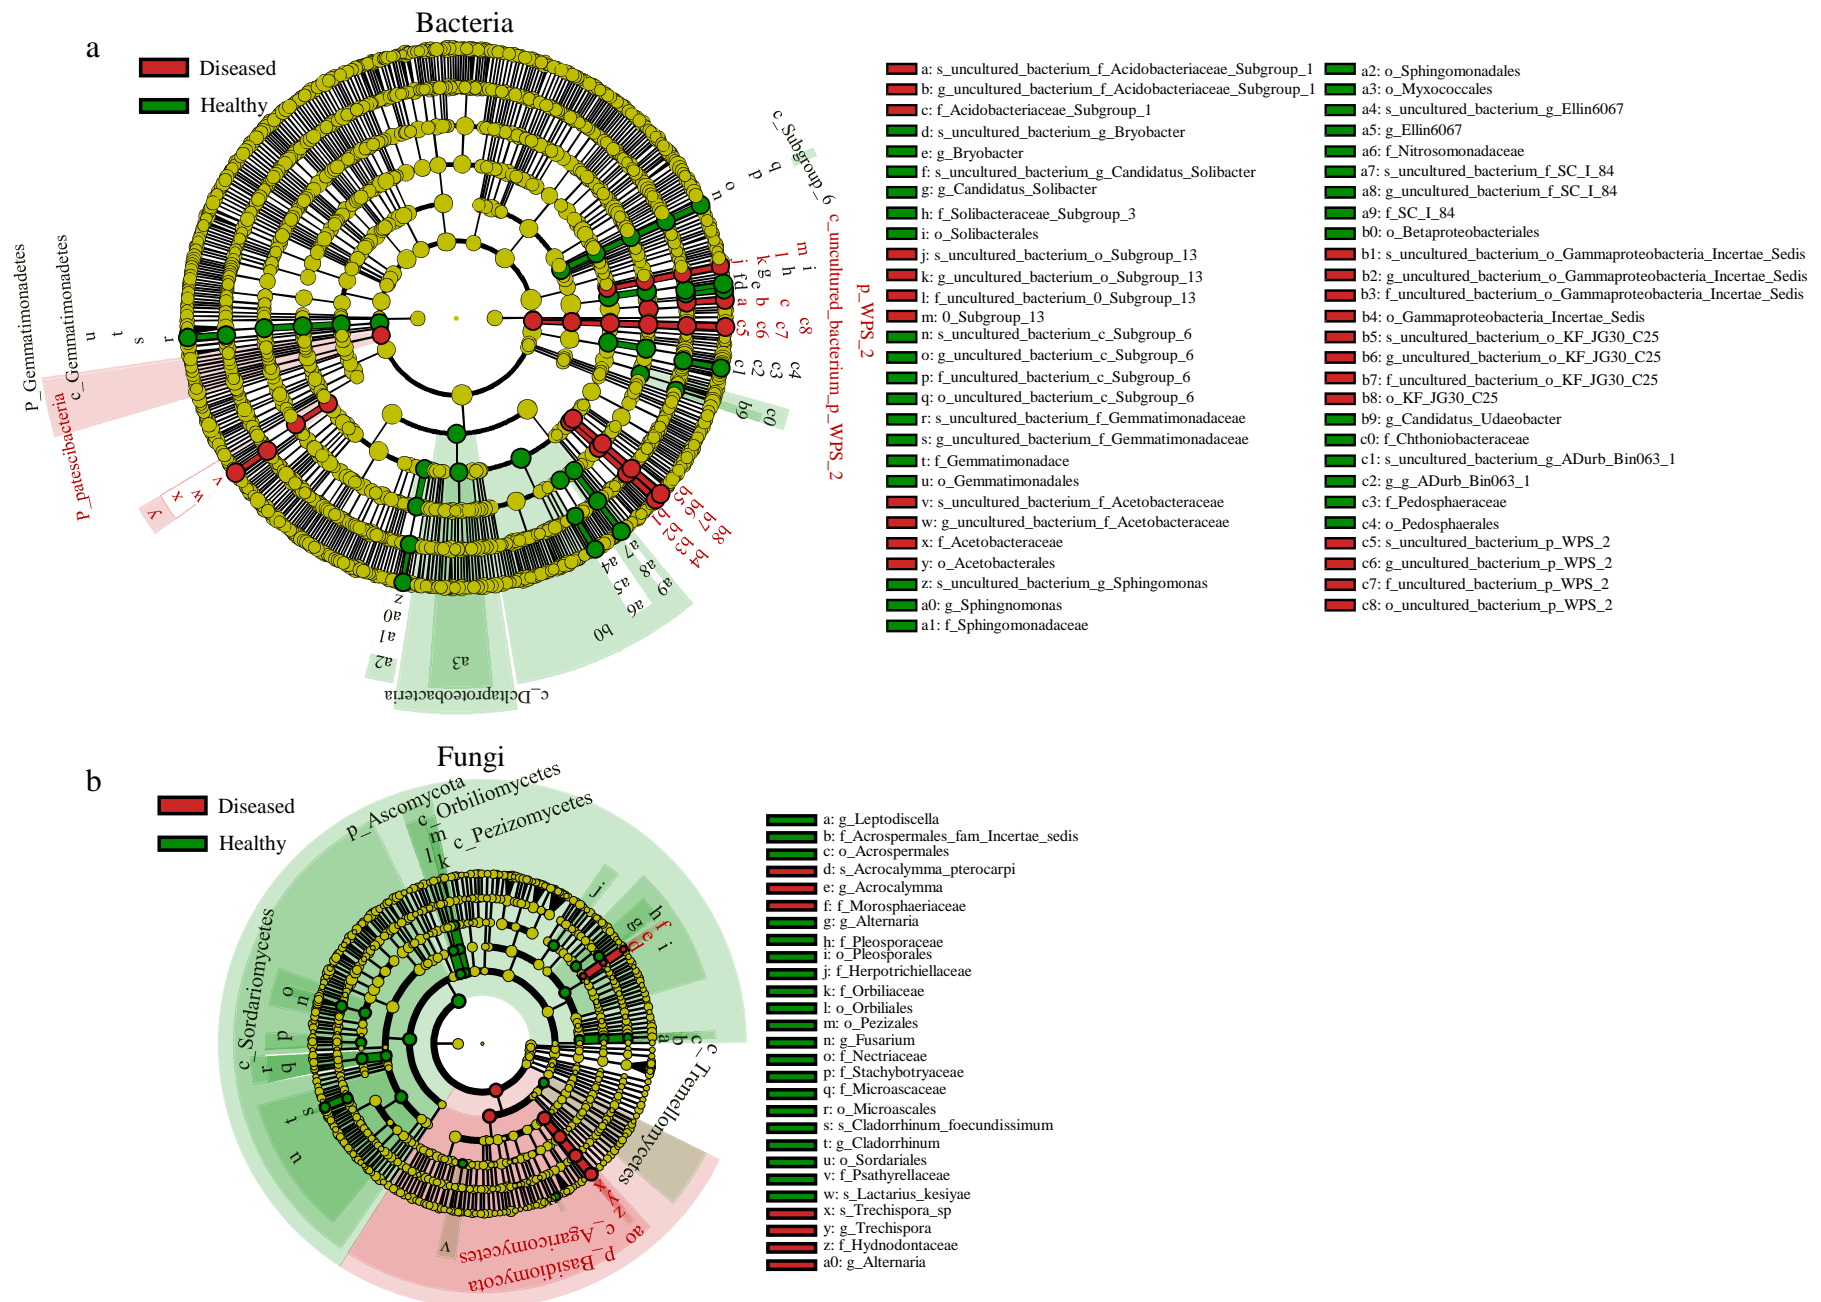

**Supplementary Figure 9.** Linear discriminant analysis effect size (LEfSe) cladograms showing soil bacterial (a) and fungal (b) abundance (biomarkers) between the healthy and diseased plants in the second year of biocontrol of FWB in the field. The diameter of each circle is proportional to the abundance.

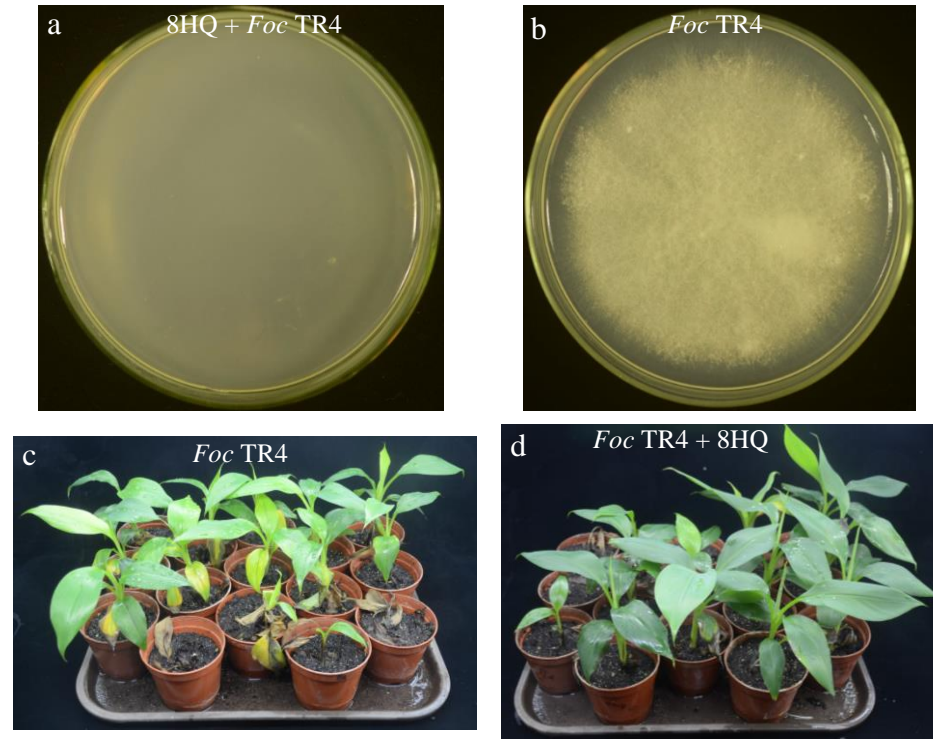

**Supplementary Figure 10. The pot trials in greenhouse showing that iron is a crucial factor in control of FWB.** a, 200  $\mu$ M 8HQ (8-Hydroxyquinoline) completely suppressed *Foc TR4* growth in a PDA plate. b, *Foc TR4* grew normally in a PDA plate. c, Banana plantlets in pots infected by *Foc TR4* showed Fusarium wilt disease of leaf yellowing after growing for 75 days. d, Banana plantlets in pots first infected by *Foc TR4* and then treated by 200  $\mu$ M 8HQ did not show Fusarium wilt disease after growing for 75 days.

**Supplementary Table 1**Table 1. Effects of *P. indica* and *Foc* TR4 treatments on growth of banana plantlets

| Character                   | Ctrl          | Pi            | <i>Foc</i> TR4 | Pi + <i>Foc</i> TR4 |
|-----------------------------|---------------|---------------|----------------|---------------------|
| Fresh root weight (g)       | 2.94 ± 0.36a  | 4.17 ± 0.15b  | 1.67 ± 0.12c   | 3.18 ± 0.28a        |
| Fresh pseudostem weight (g) | 5.55 ± 0.38a  | 8.38 ± 0.12b  | 3.83 ± 0.16c   | 5.57 ± 0.02a        |
| Plantlet height (cm)        | 24.33 ± 0.66a | 28.66 ± 0.33b | 20.66 ± 0.33c  | 23.00 ± 0.57d       |

Notes: Experiment was repeat three times with similar results. Each treatment contained 15 plantlets. the means and standard errors were shown. ANOVA was used to analyze data and LSD comparison was used to detect significance. Different letters behind the numbers in the same row indicate statistical significance at  $P < 0.05$ .

**Supplementary Table 2**

Table 2 Comparison of the alpha-diversity indexes of the rhizosphere microbiome from diseased, healthy and bio-treated plants in two years

| Soil Sample |             | Community indexes   |          |         |                  |          |         |
|-------------|-------------|---------------------|----------|---------|------------------|----------|---------|
|             |             | Bacterial community |          |         | Fungal community |          |         |
|             |             | ACE                 | Chao1    | Shannon | ACE              | Chao1    | Shannon |
| Year1       | Diseased    | 1427.53a            | 1437.24a | 4.97a   | 248.69a          | 258.18a  | 3.07a   |
|             | Healthy     | 1476.76a            | 1505.97a | 7.34b   | 347.46b          | 369.37b  | 5.19b   |
|             | Bio-treated | 1441.34a            | 1464.92a | 7.61b   | 344.63b          | 353.95b  | 5.41b   |
| Year2       | Diseased    | 1430.61a            | 1463.72a | 8.41a   | 471.61a          | 424.12a  | 3.78a   |
|             | Healthy     | 1743.84b            | 1769.22b | 8.96b   | 585.64ab         | 489.06ab | 5.72b   |
|             | Bio-treated | 1769.94b            | 1805.36b | 8.93b   | 614.41b          | 520.62b  | 6.33b   |

Note: ANOVA was used to analyze data and LSD comparison was used to detect significance. Different letters behind the numbers in the same column of the same year indicate statistical significance at  $P < 0.05$ .

**Supplementary Table 3**

Table 3 Properties of the rhizosphere soil from diseased, healthy and bio-treated plants in two years

|        | Soil sample | pH          | SM (%)      | TN (%)      | TP (%)      | TF (%)      |
|--------|-------------|-------------|-------------|-------------|-------------|-------------|
| Year 1 | Diseased    | 5.02±0.014a | 0.24±0.003a | 0.16±0.006a | 0.08±0.002a | 0.08±0.001a |
|        | Healthy     | 5.89±0.015b | 0.26±0.011a | 0.21±0.005b | 0.11±0.006b | 0.06±0.002b |
|        | Bio-treated | 5.81±0.165b | 0.25±0.015a | 0.22±0.004b | 0.12±0.002b | 0.06±0.007b |
| Year 2 | Diseased    | 5.45±0.047a | 0.15±0.005a | 0.09±0.005a | 0.06±0.001a | 0.08±0.003a |
|        | Healthy     | 5.99±0.087b | 0.14±0.012a | 0.17±0.008b | 0.10±0.009b | 0.04±0.005b |
|        | Bio-treated | 5.92±0.074b | 0.15±0.008a | 0.15±0.010b | 0.09±0.006b | 0.05±0.002b |

Note: Experiment was repeat three times with similar results. The means and standard errors were shown. ANOVA was used to analyze data and LSD comparison was used to detect significance. SM, soil moisture; TN, total nitrogen; TP, total phosphorus; TF, total ferrum. Different letters behind the numbers in the same column of the same year indicate statistical significance at  $P < 0.05$ .
