# Supplementary material for: Spatiotemporal biocontrol and rhizosphere microbiome analysis of Fusarium wilt of banana
Source: PubMed Central journal article supplement (PMC9834294; doi:10.1038/s42003-023-04417-w), 2023-01-11
Supplement: 42003_2023_4417_MOESM3_ESM.pdf [file 42003_2023_4417_MOESM3_ESM.pdf]

## **Description of Additional Supplementary Files**

File name: Supplementary Data 1

Description: Accession numbers for sequence data used in the analysis

File name: Supplementary Data 2

Description: The source data behind the graphs in the paper
